# Supplementary material for: Variation at an adhesin locus suggests sociality in natural populations of the yeast Saccharomyces cerevisiae
Source: PubMed Central journal article supplement (PMC6834051; doi:10.1098/rspb.2019.1948), 2019-10-16
Supplement: rspb20191948supp1.pdf [file rspb20191948supp1.pdf]

## Supplementary Information

**Figure S1:** Biofilm phenotypes of the 78-Strain panel.

**Figure S2:** A domain amino acid alignment.

**Figure S3:** C domain amino acid alignment.

**Figure S4:** Inferred breakpoints via GARD.

**Figure S5:** Genetic variation at *FLO11* compared to variation in genes that code for proteins with similar properties.

**Figure S6:** Upstream regulatory alignment.

**Figure S7:** Distribution of Tajima's D values.

**Figure S8:** Distribution of social scores among the regulatory clades

**Figure S9:** Functional assay of natural *FLO11* alleles.

**Table S1:** Strain table and data summary

**Table S2:** Genes for cell wall and GPI-anchored proteins

**Table S3:** Strains used in the cell wall and GPI-anchored genes analysis

**Table S4:** Strains for functional analysis

**Table S5:** Primers

**Table S6:** PAML model results for the full data set and various trees

**Table S7:** PAML significant sites associated with Table S2

**Table S8:** PAML model results separating strains with and without the insert

**Table S9:** PAML significant sites associated with Table S4

**Table S10:** GARD results

**Table S11:** PAML model results for recombination segments

**Table S12:** PAML significant sites associated with Table S6

**Table S13:** ANOVA analysis of *prFLO11-GFP* expression

**Data files:** Fasta files and PAML files will be included.

**Figure S1: Biofilm phenotypes of the 78-Strain panel.** (A) Scale for scoring biofilm mats and colonies. (B) Distribution of average social scores. (C) Complex colony morphology on a low dextrose 2% agar plate. (D) Mat biofilms formed on low dextrose 0.3% agar plates. In both C and D, samples 1-78 (as described in Table S1) are arrayed in order from A1-A12, B1-B12, etc.

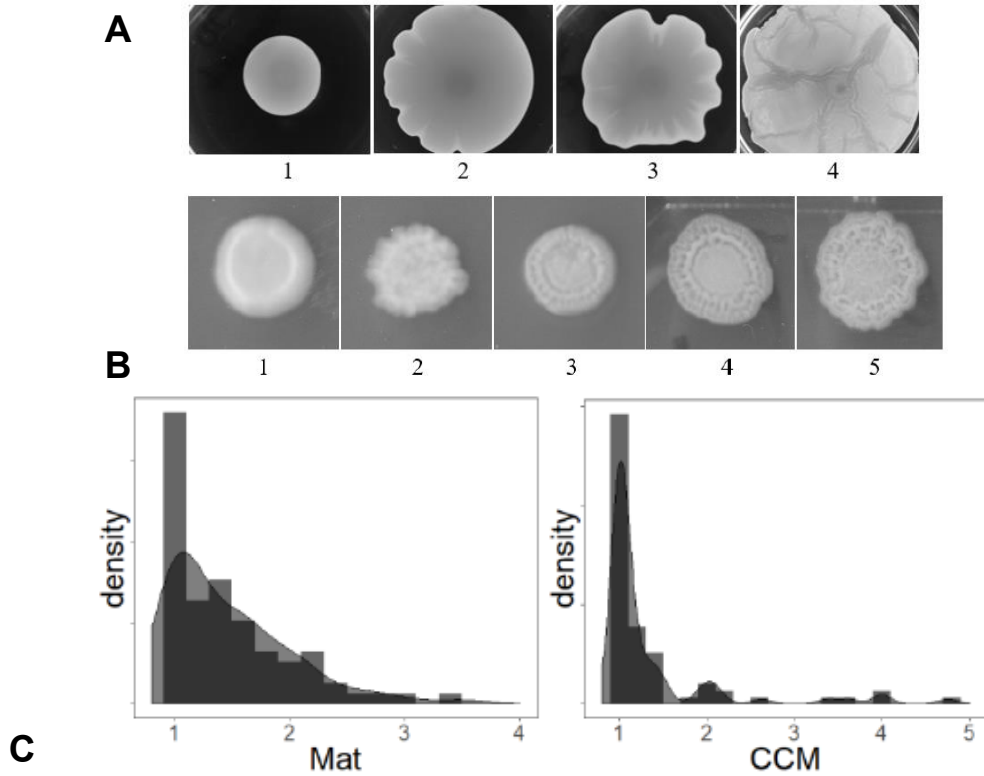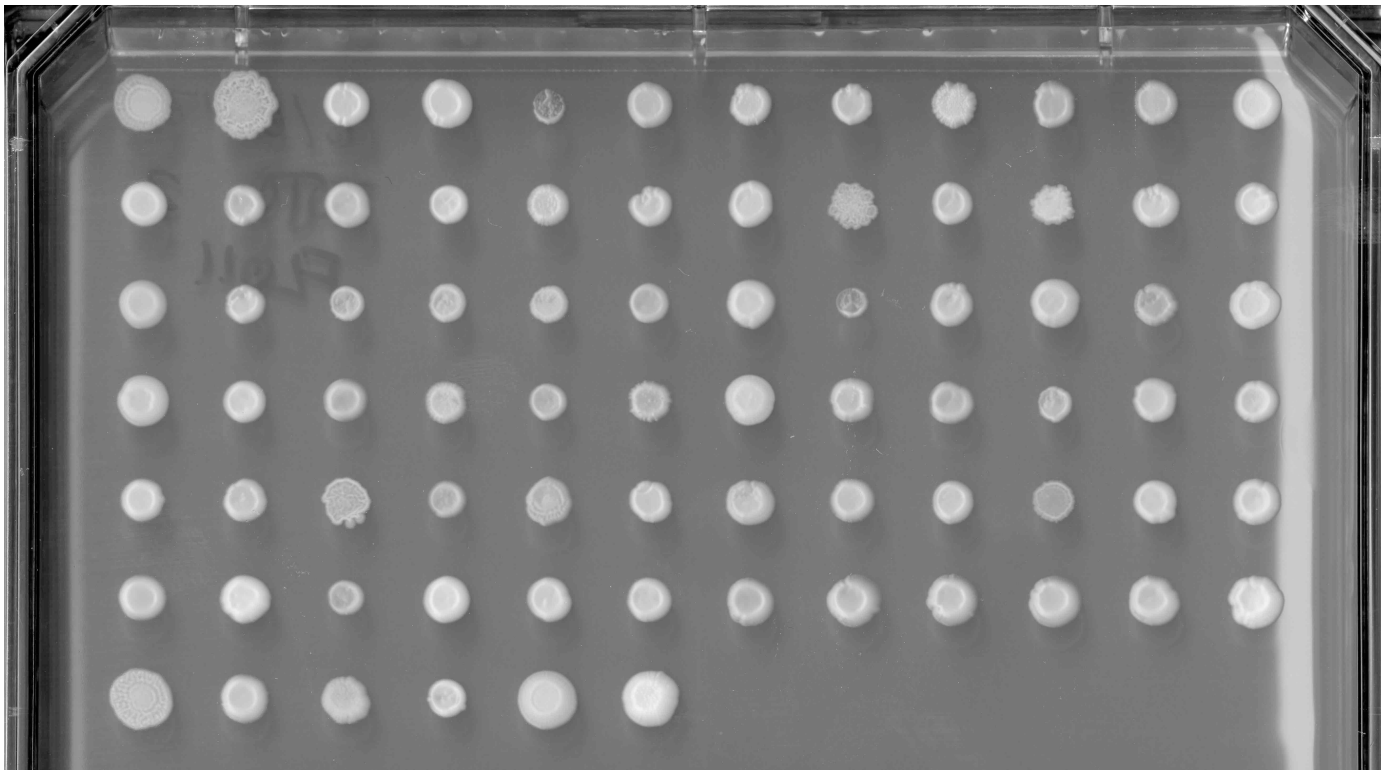

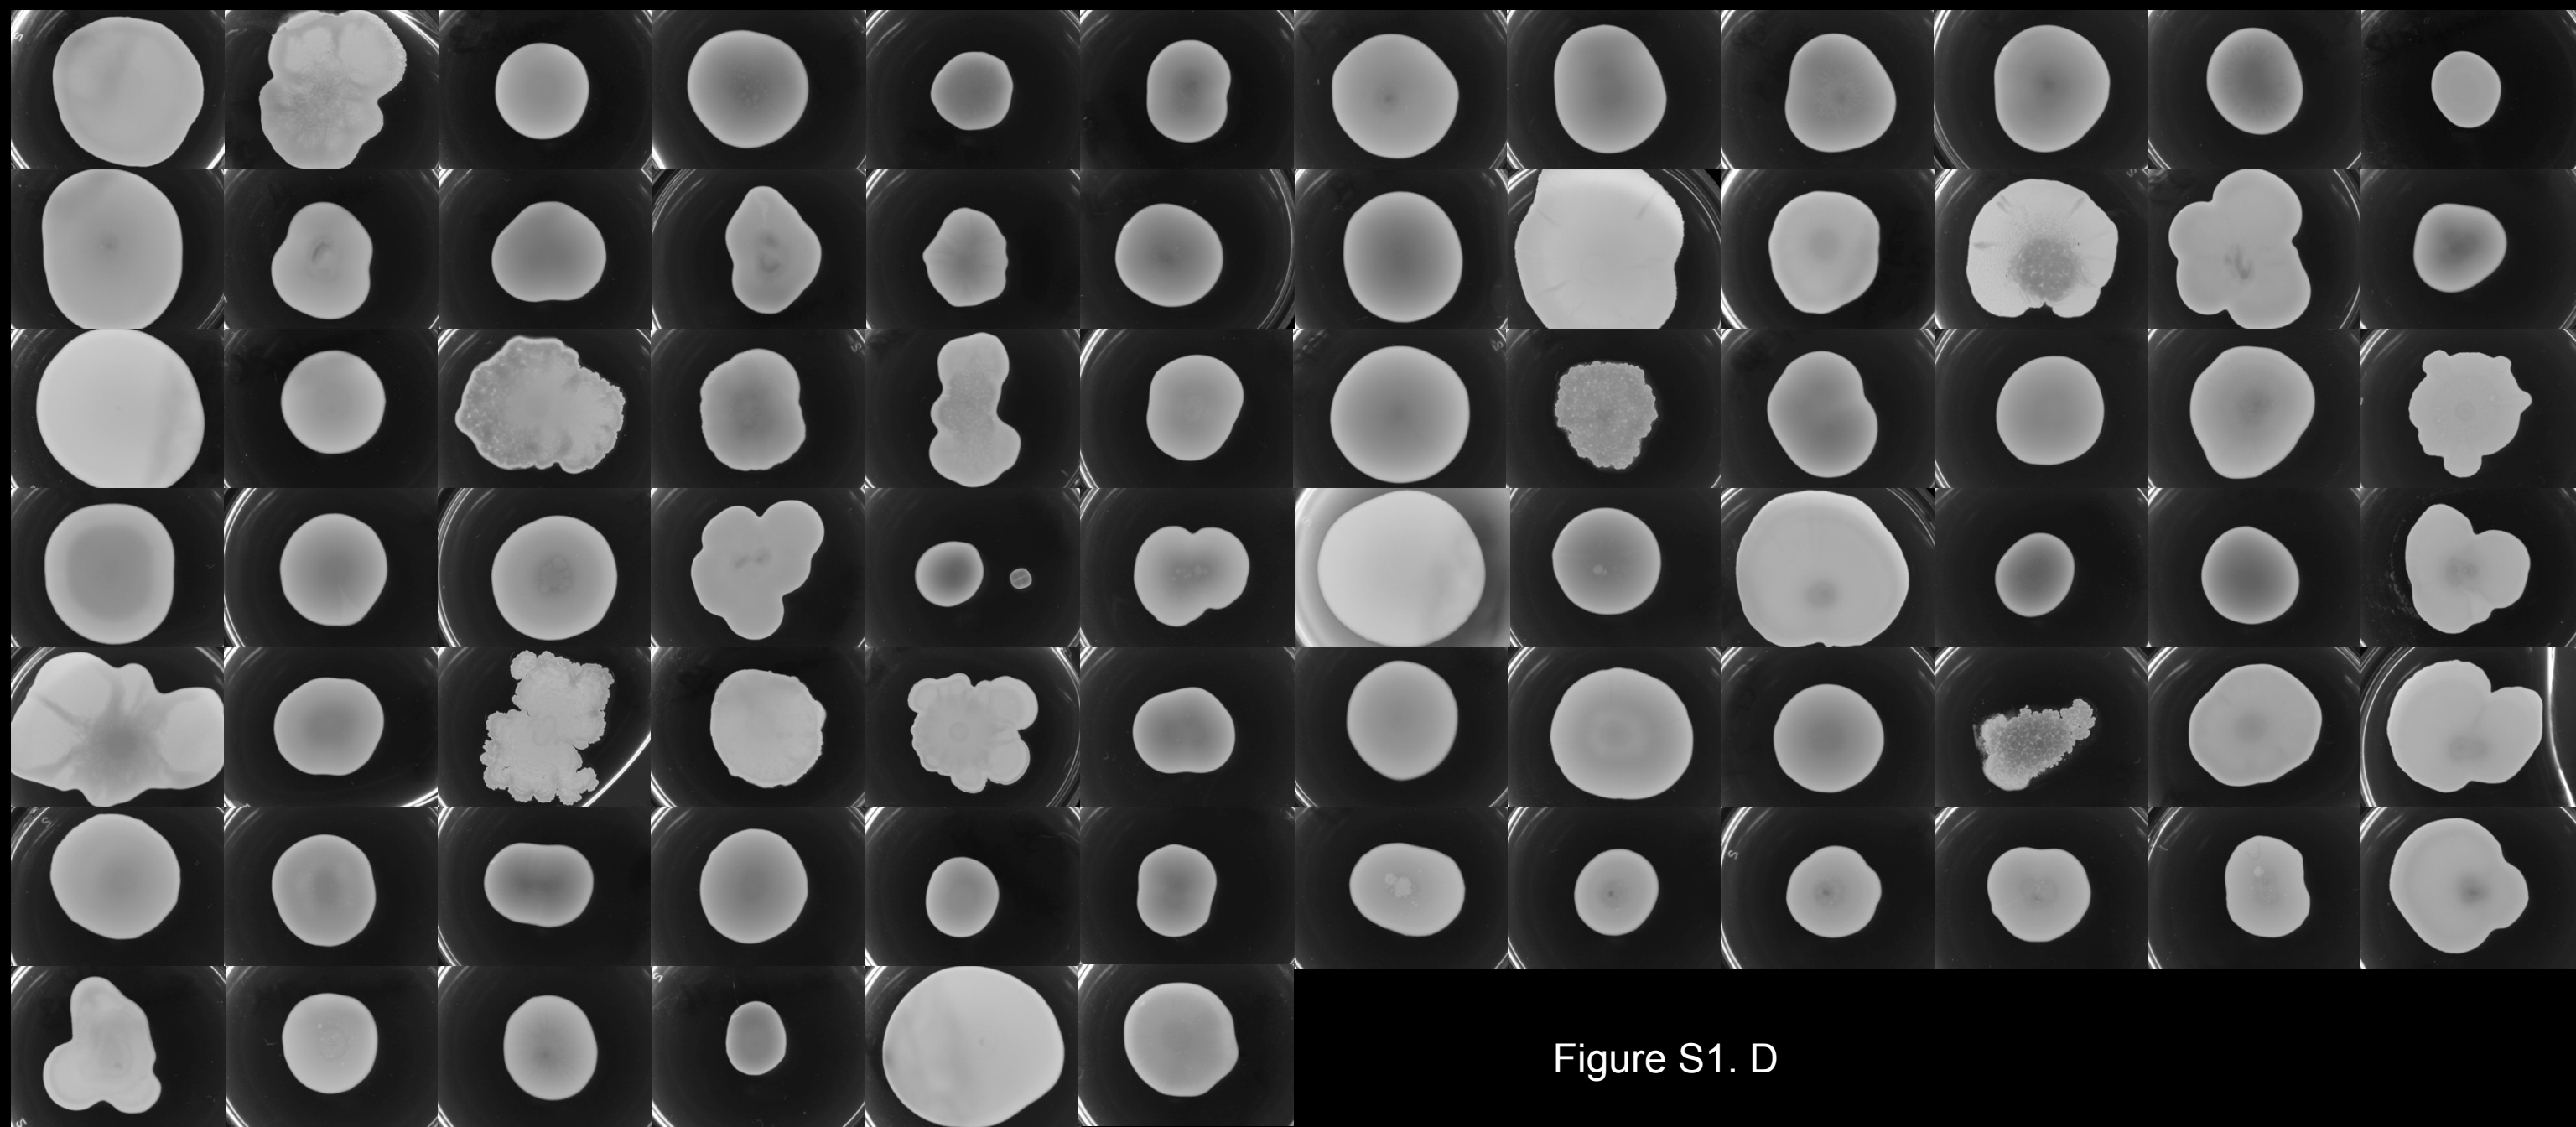

Figure S1. D



**Figure S2: A domain amino acid alignment.** Gray boxes are beta sheets; red, green and blue are apical regions, as in Figure 1. Black stars indicate aromatic band I in the apical region; gray stars indicate aromatic band II in the neck subdomain.

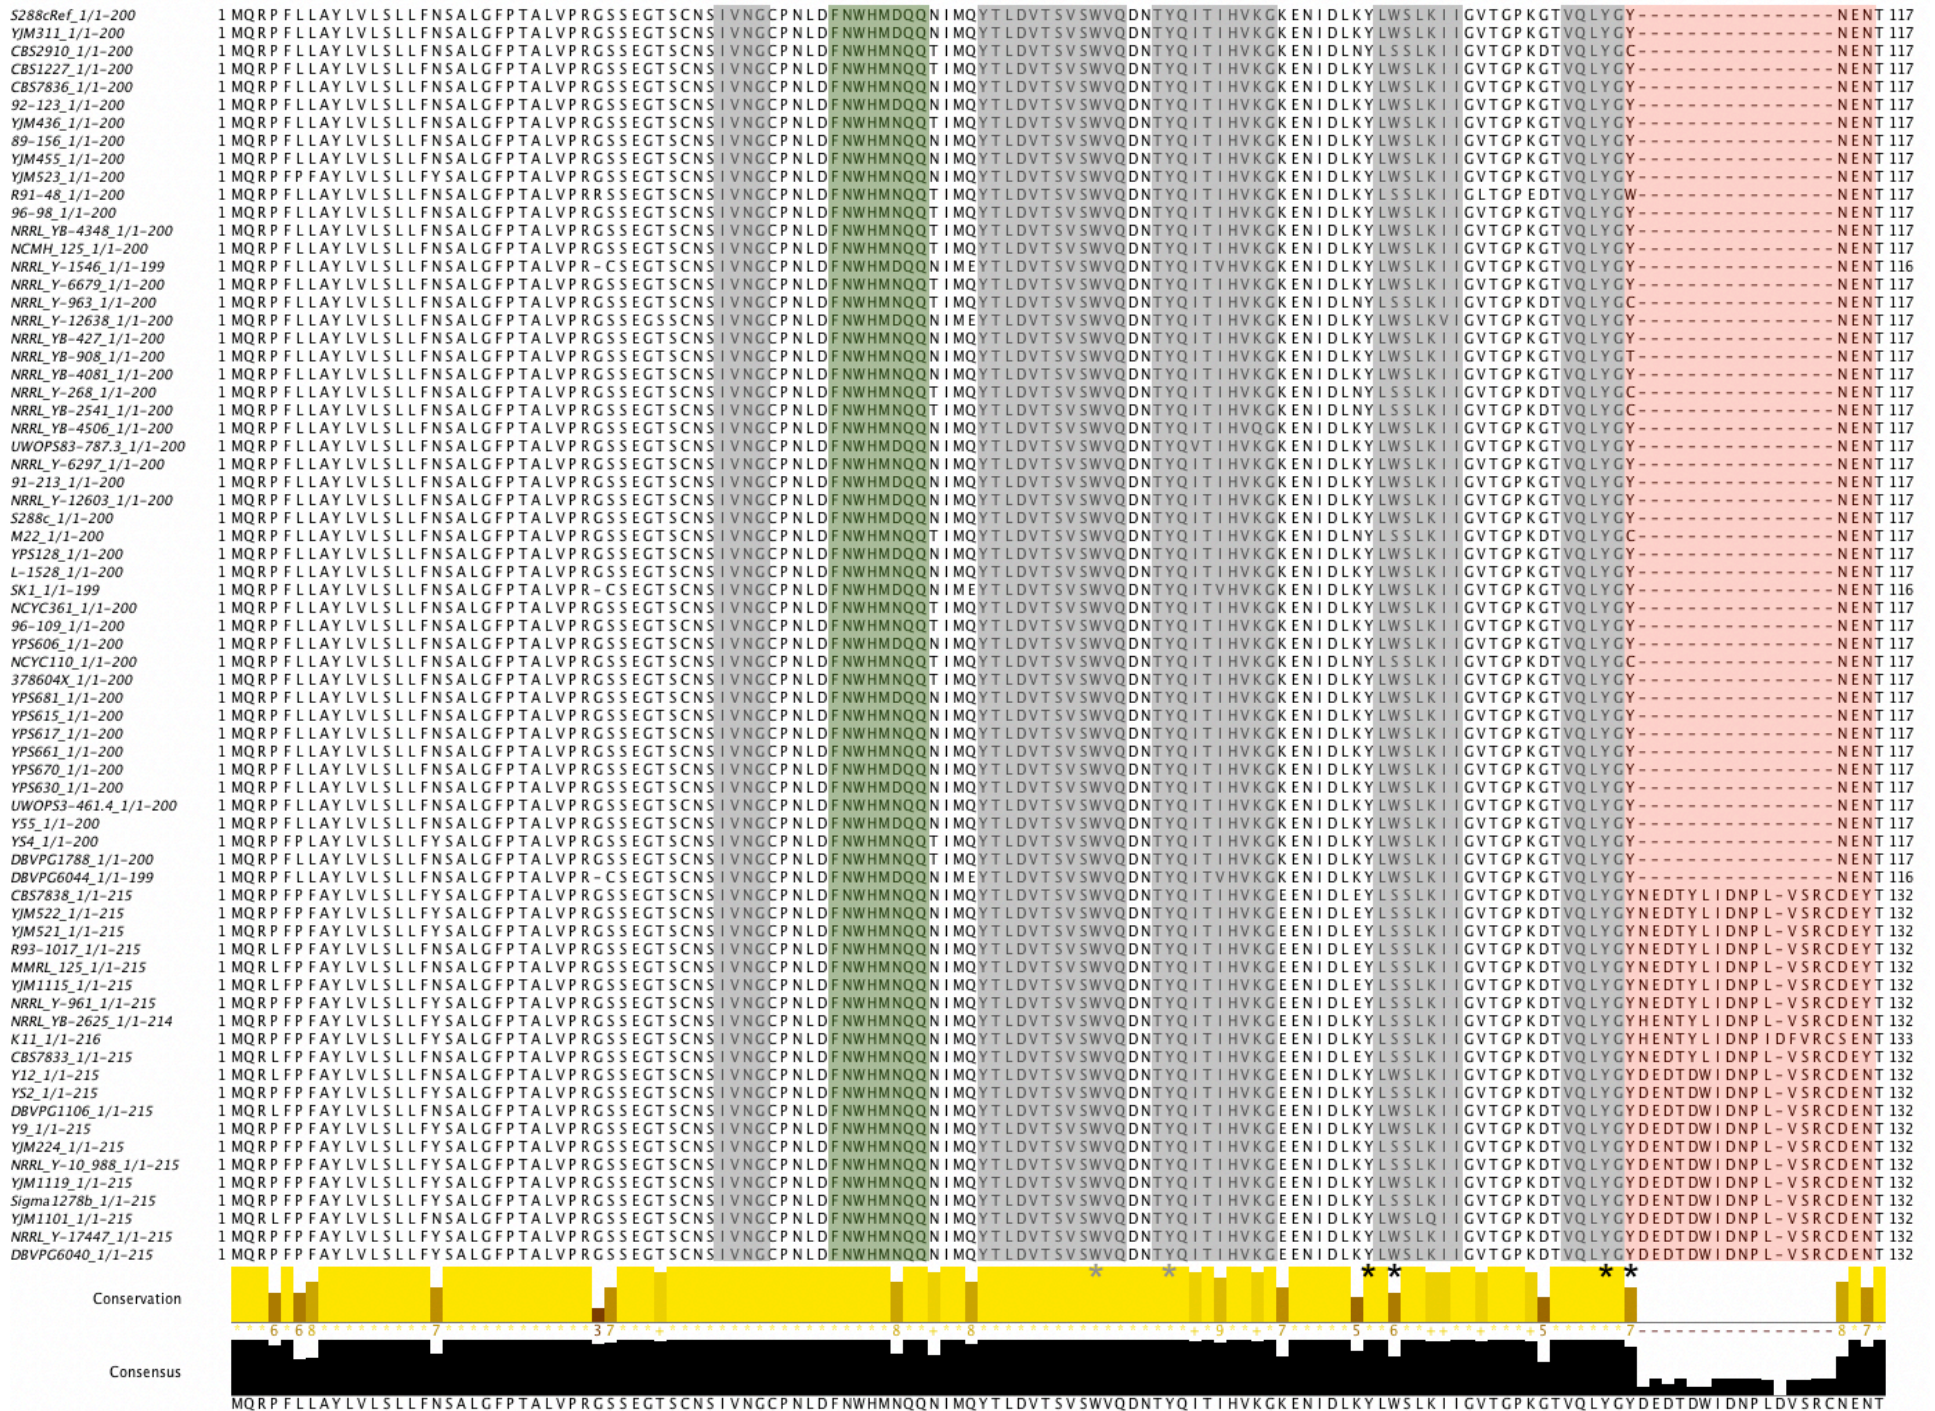







**Figure S3:** C domain amino acid alignment. Black line indicates location that defined C-domain in our analysis. Gray domain indicates GPI-anchored area.

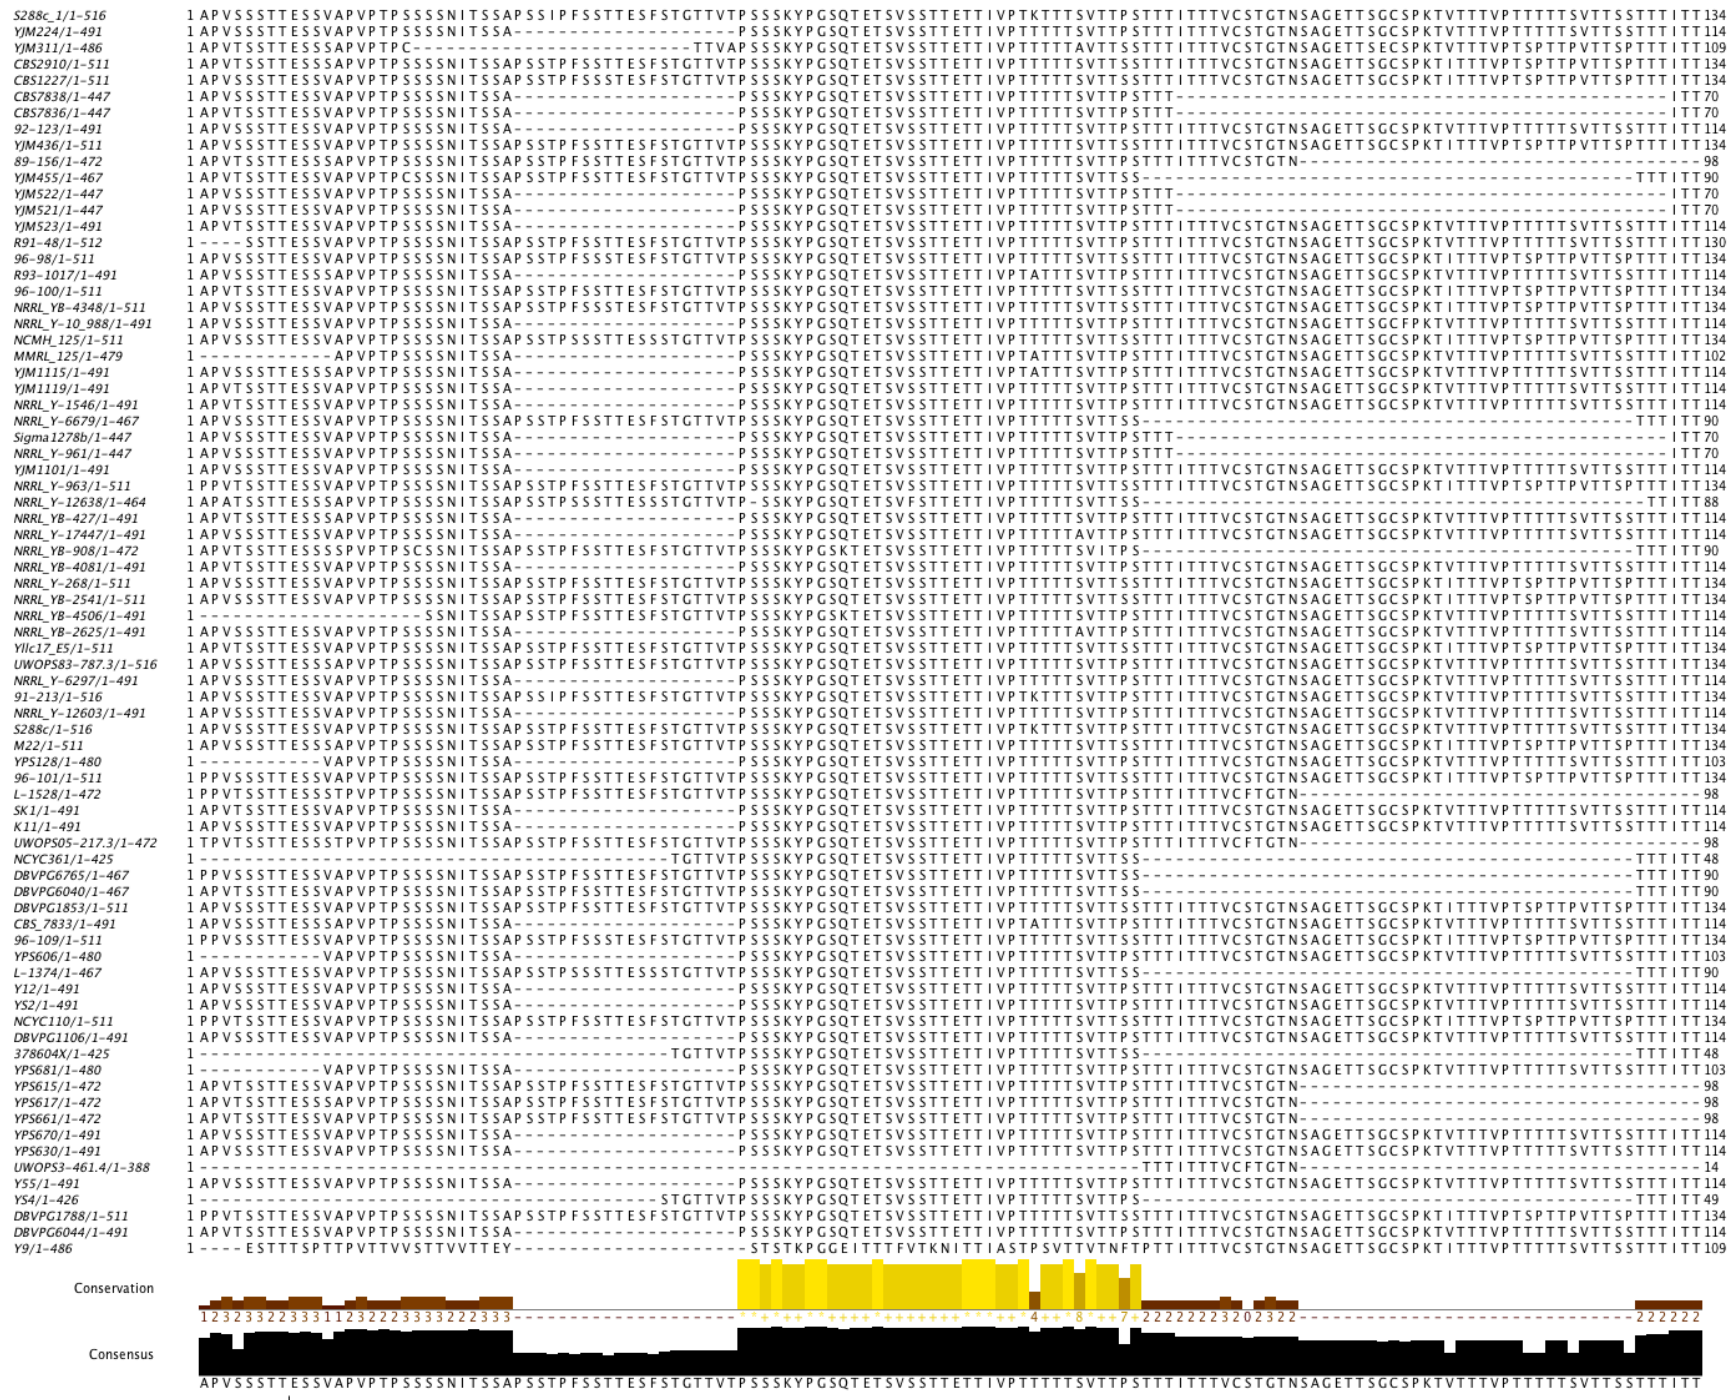













**Figure S4: Detection of recombination breakpoints within the FLO11 coding region.** The data were analyzed with the A domain alone, the A-C domains concatenated, and data that included a part of the B domain that could be resolved and aligned. x-axis is the nucleotide position in the gene and the y-axis is support for a breakpoint, as determined via GARD (note the different scales).

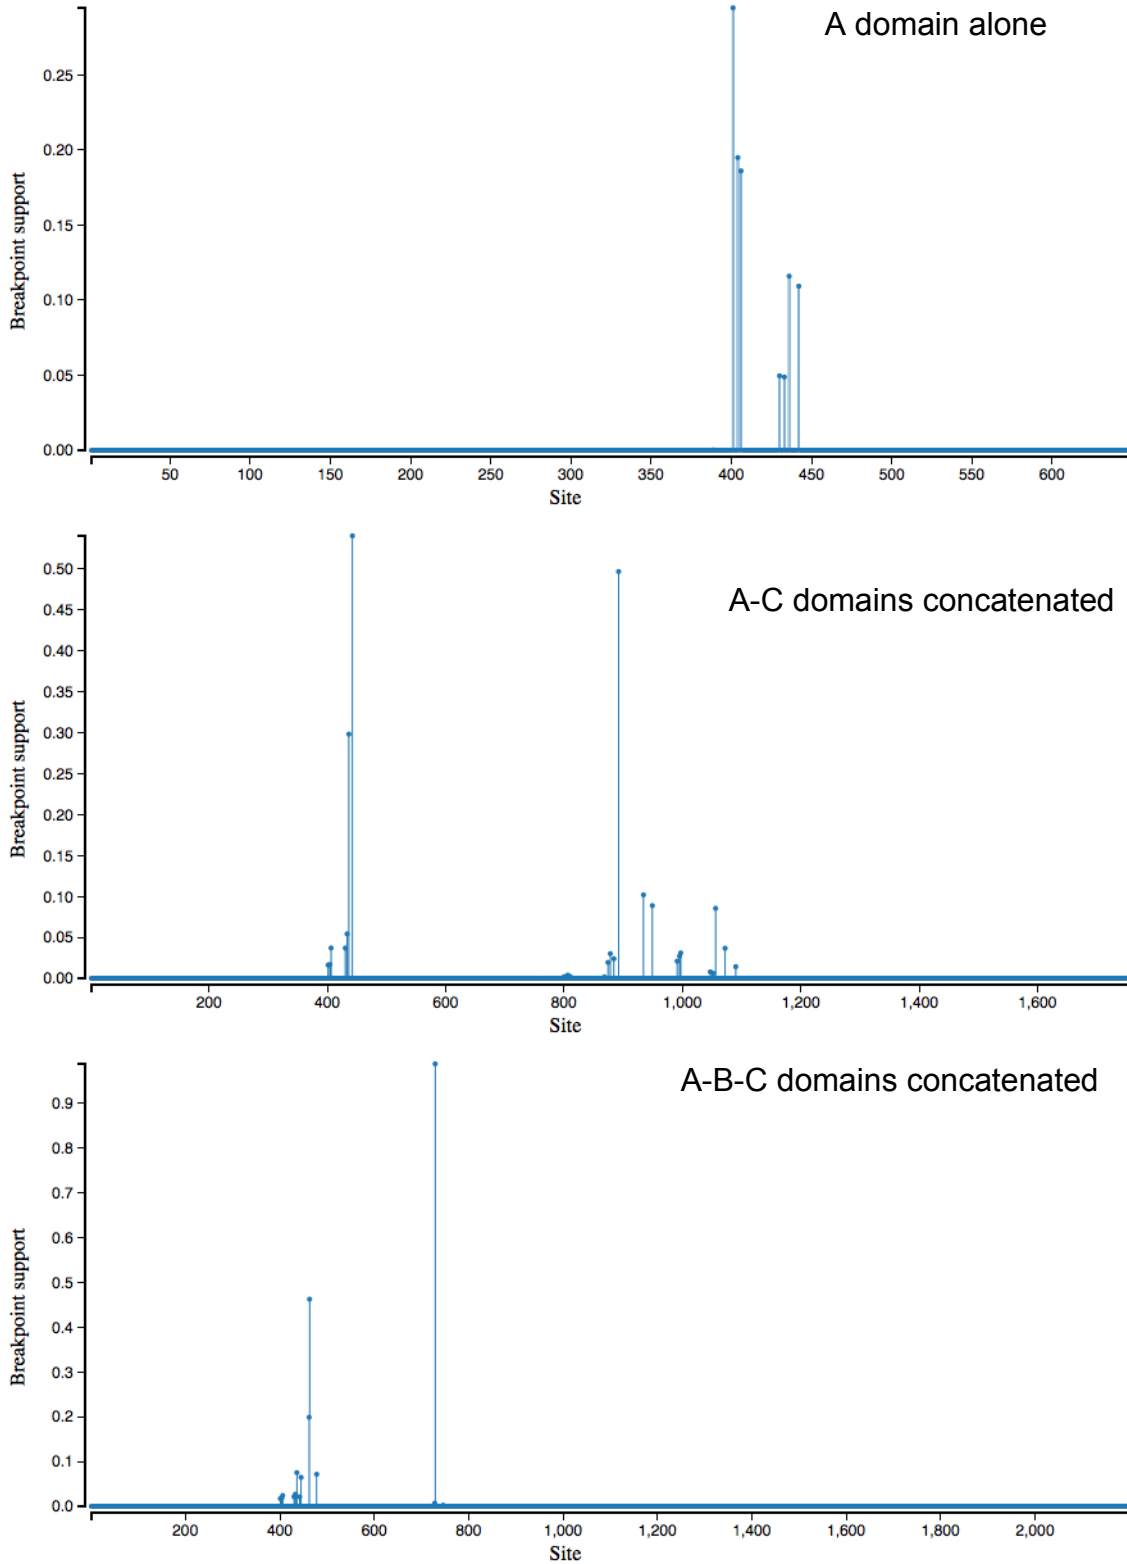



**Figure S5: Genetic variation at *FLO11* compared to variation in genes that code for proteins with similar properties.** Each data point represents a pairwise comparison between strains, for a given gene, as estimated in PAML using the yn00 function (N=54 strains and 43 genes for a total of ~65,000 data points). Red points represent *FLO11* comparisons.

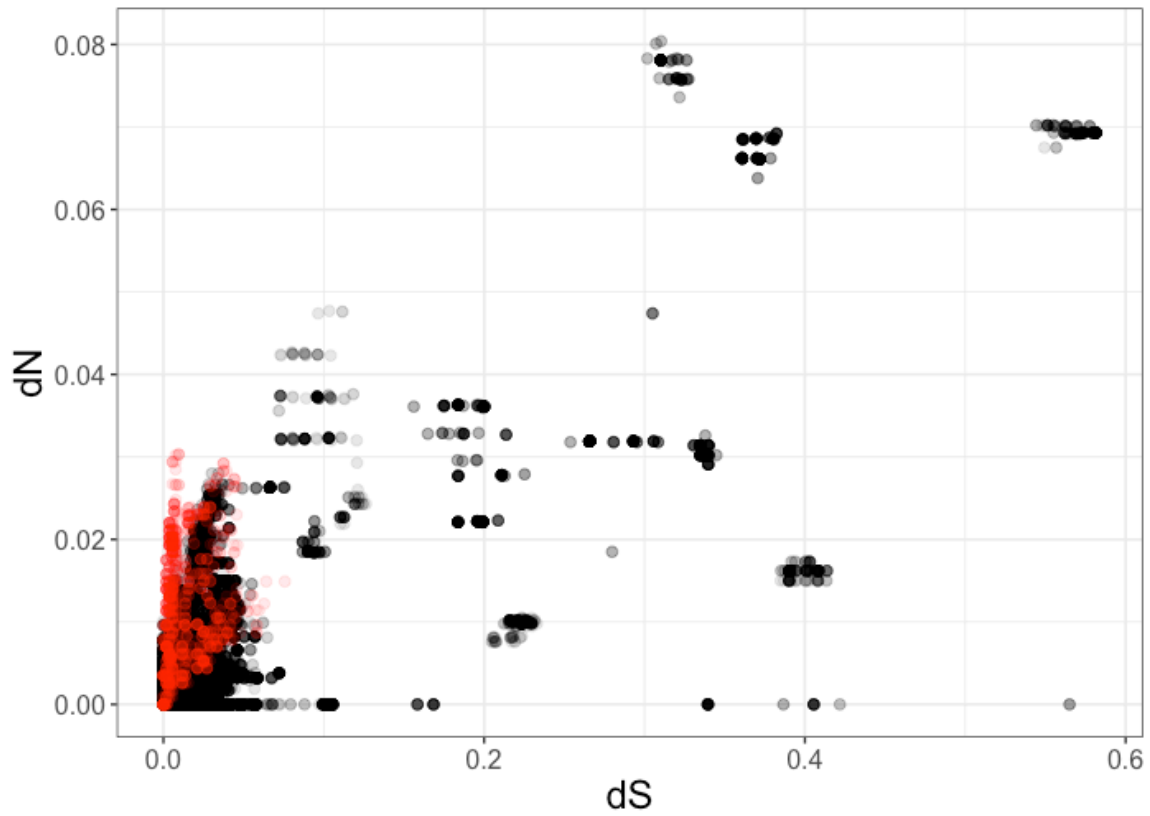

Figure S6: Upstream regulatory alignment. Position 1 is -3544; positions 3545-6 are the start codon.

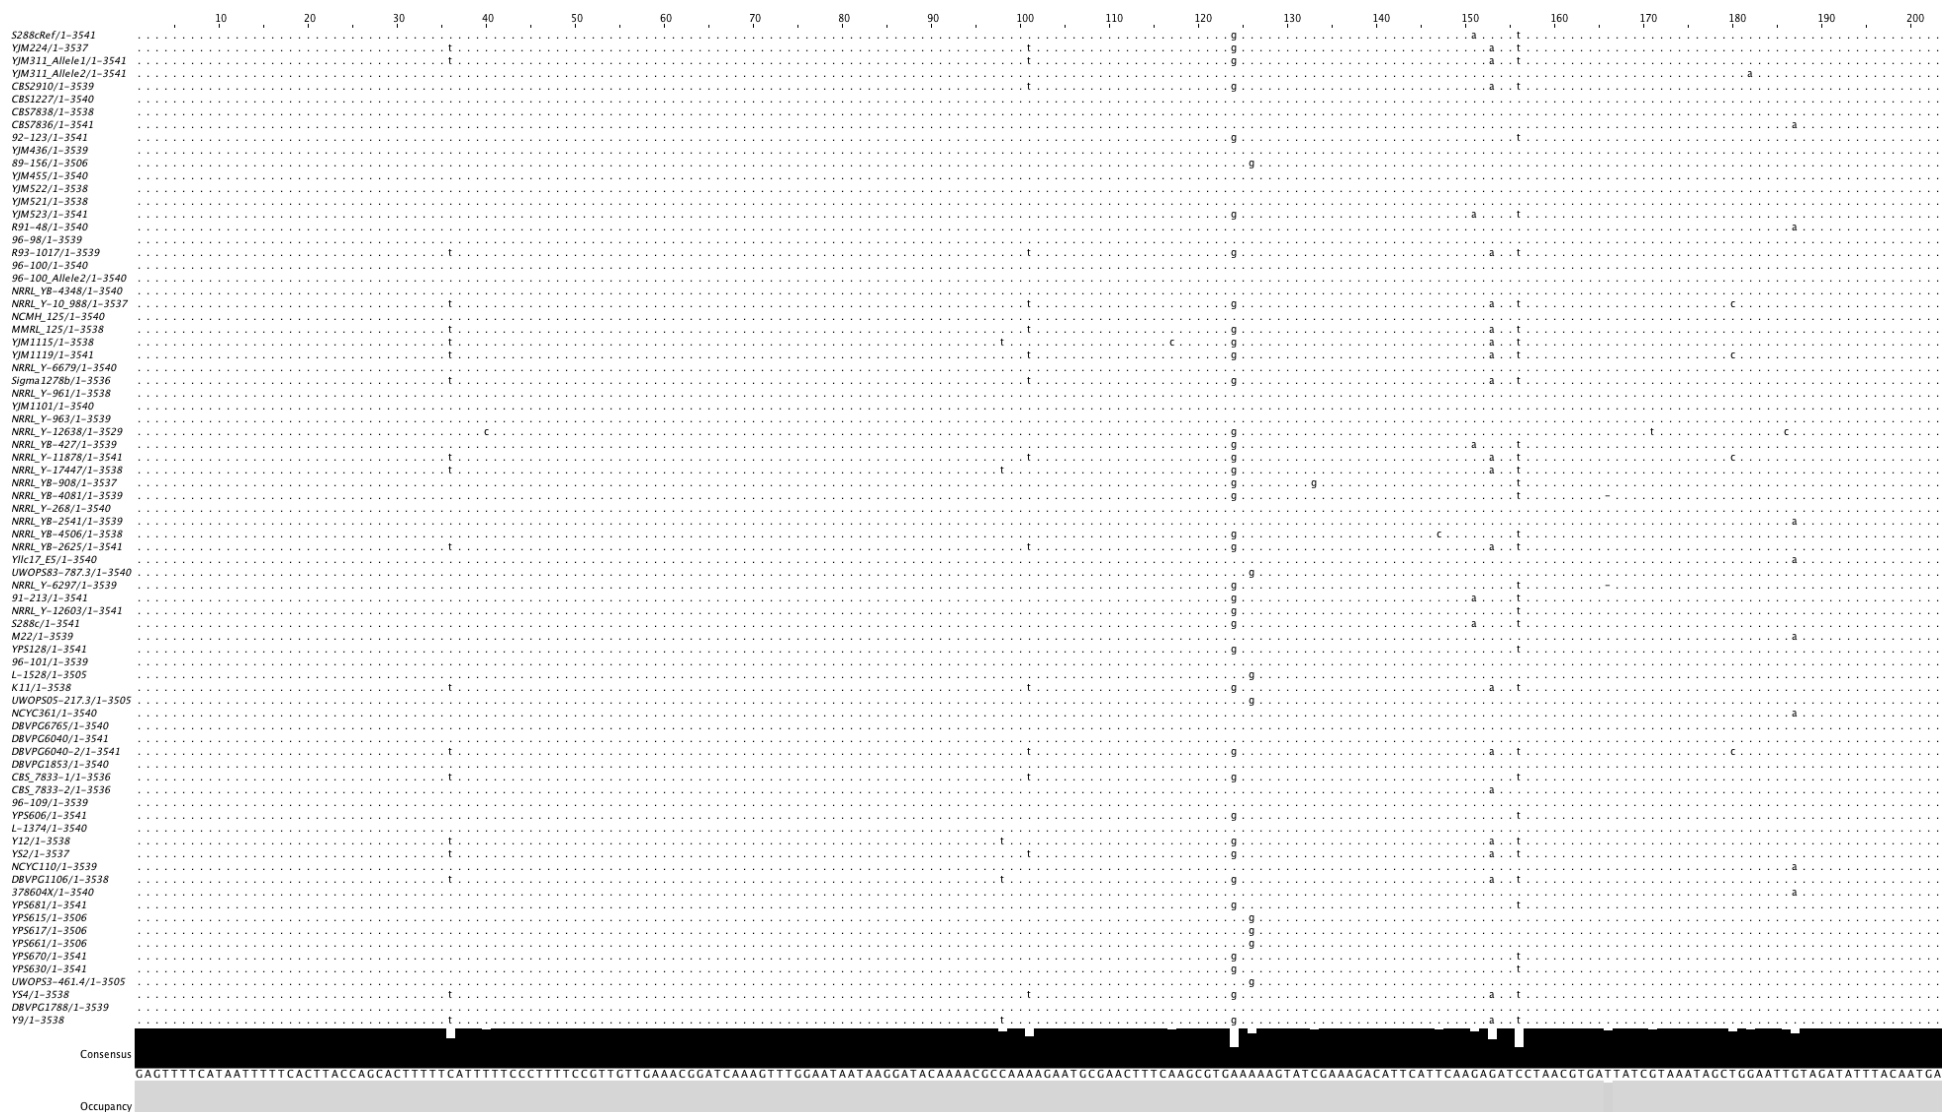







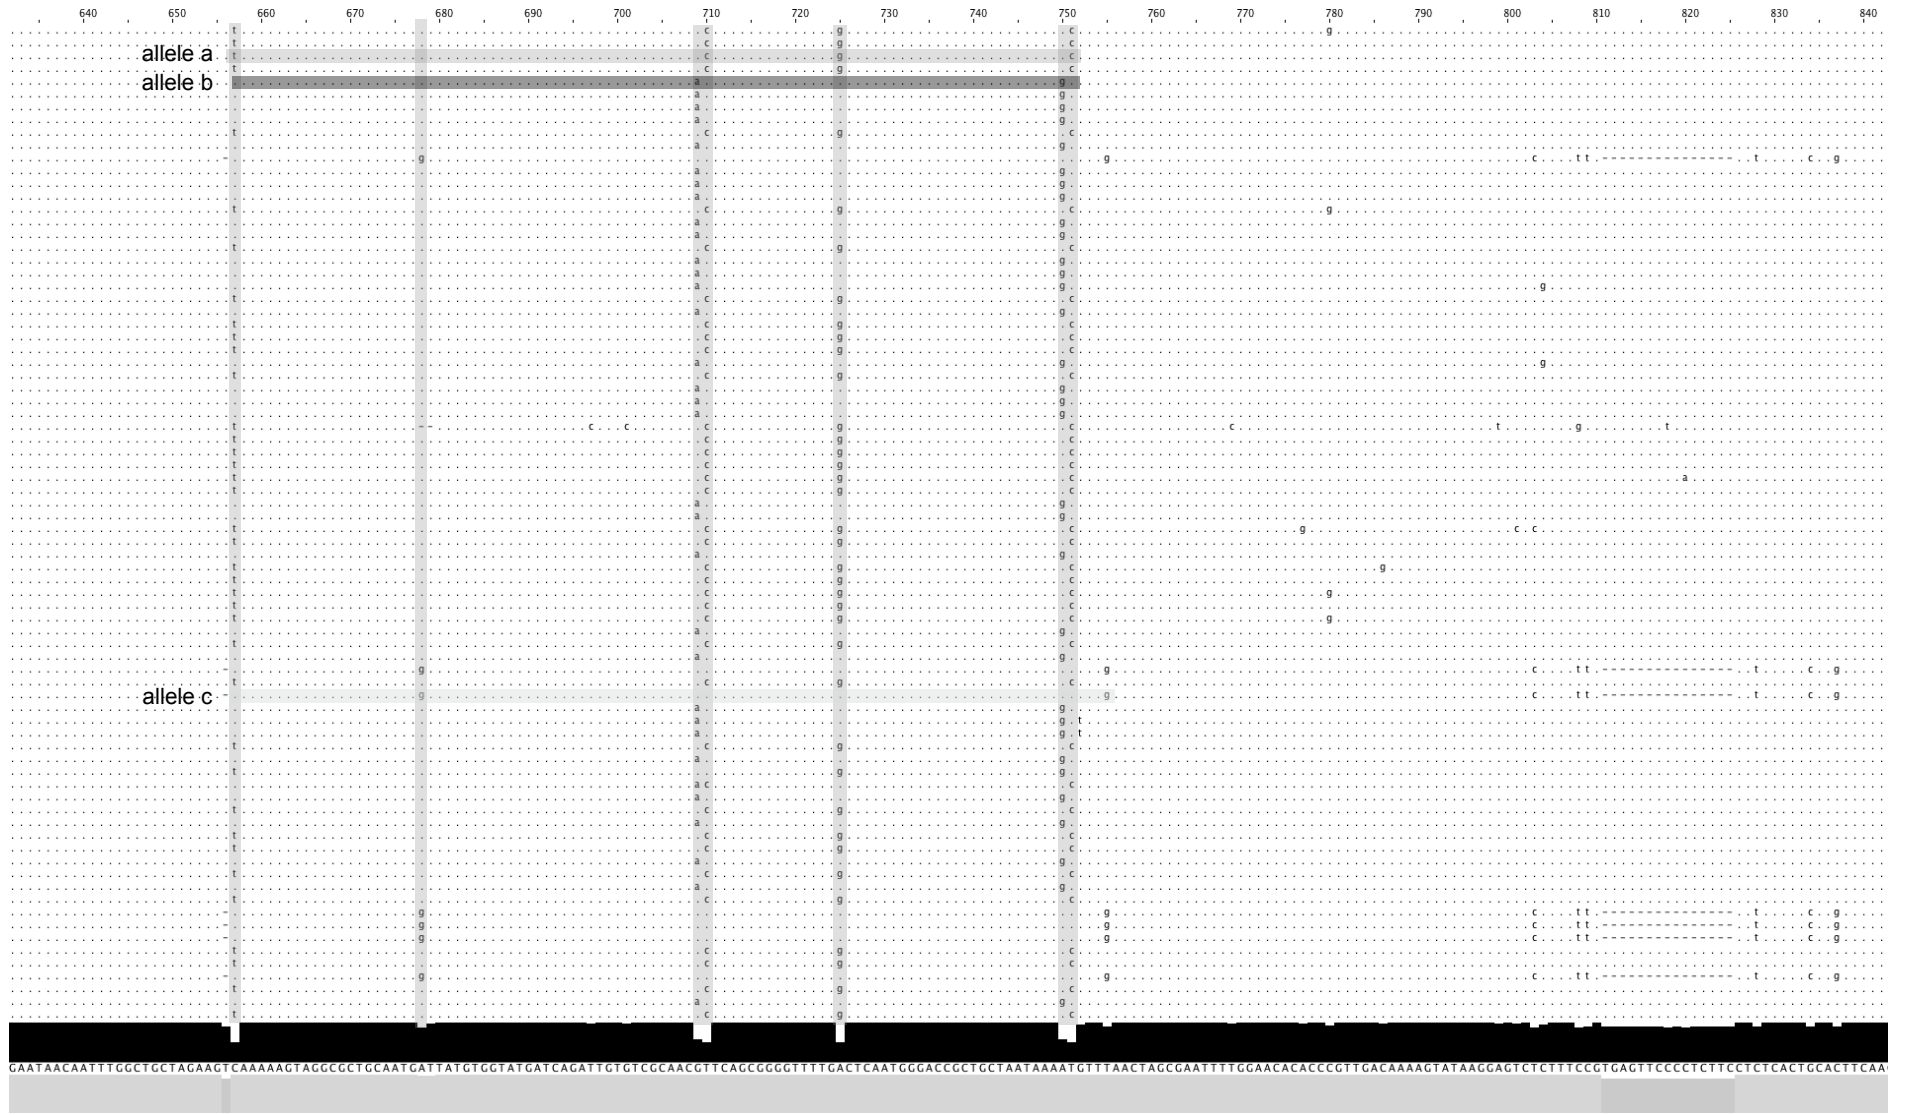

















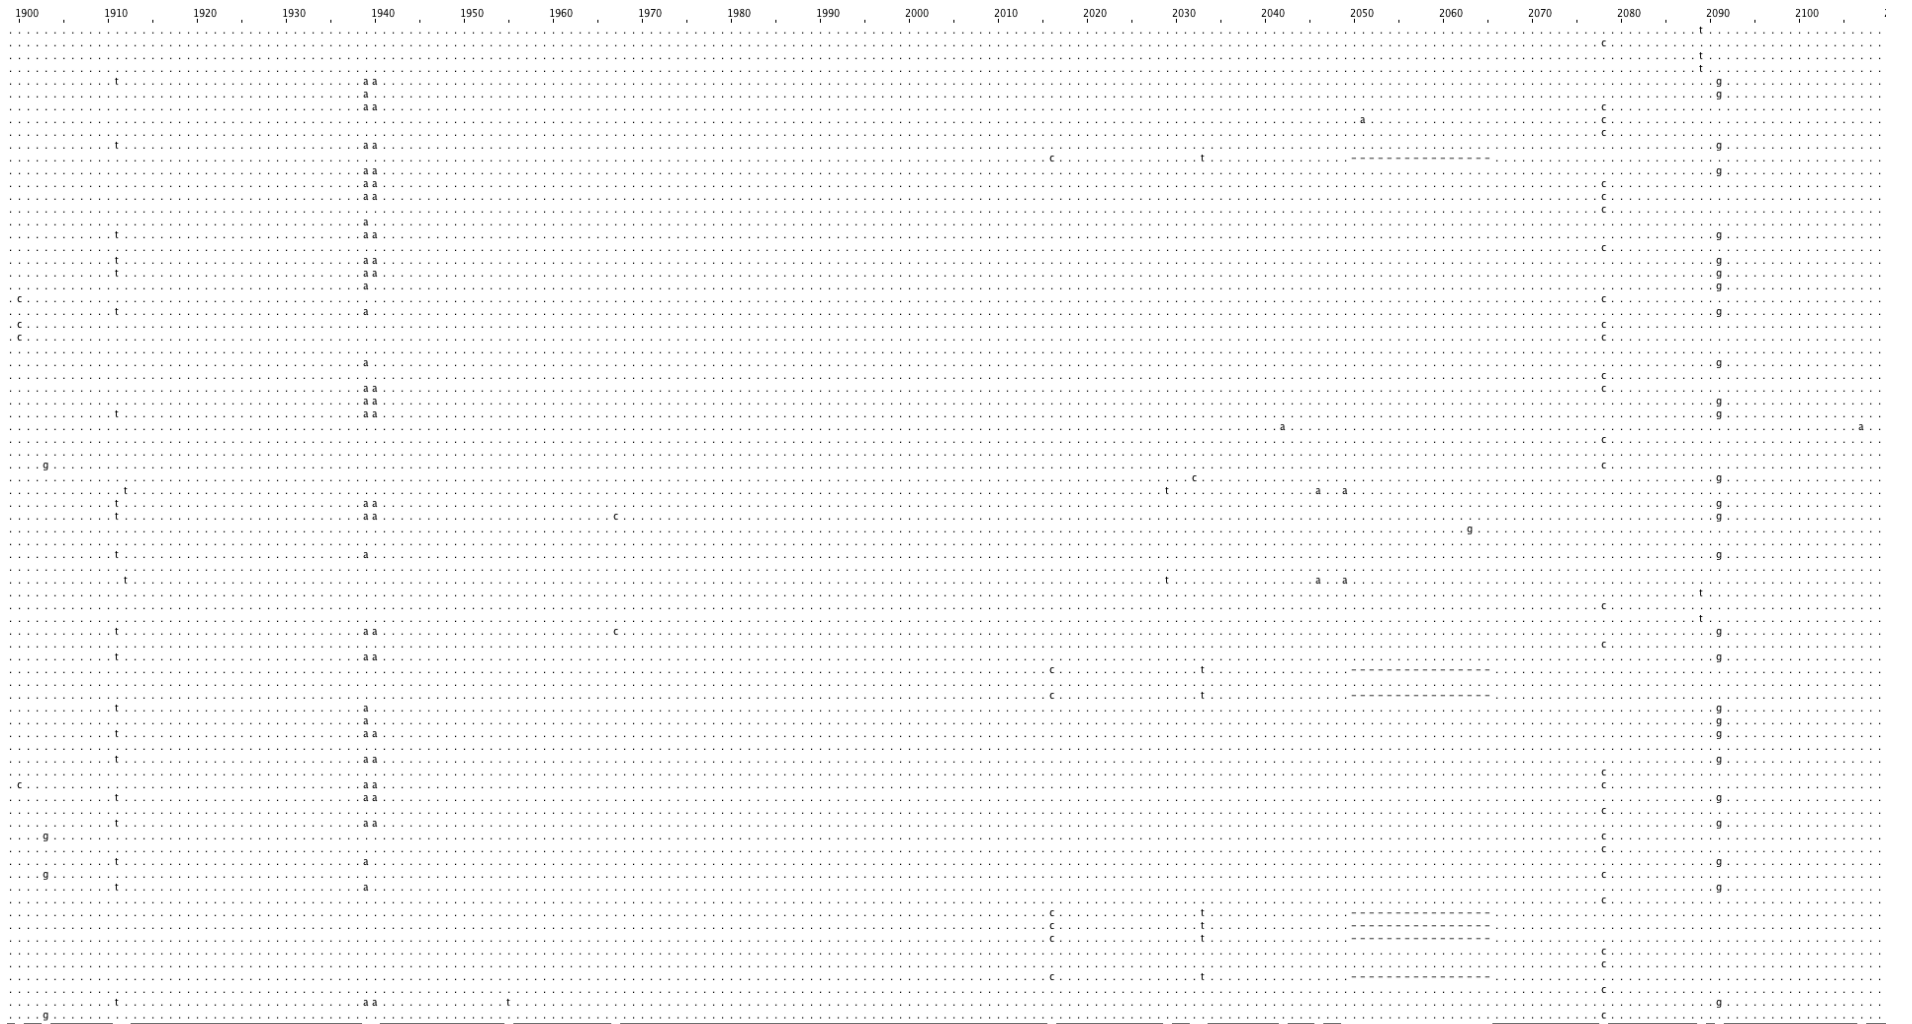

CGGGAAAACGGACCTAACACGAATGTAATCGGCTAATCGGTATTTCCACCACATGAAACCTGCTACTTTTTCACTCCTCTTCGTATGCATTTCCAAAATTCATTTCGTAGCCTTGTCAACTTAGACTCAGTTCACCGCGTGCAGGACGGGTATTATGAATAAAGGATCCACGGGTGAGATTTGTTCTATGTTTTAGGTATGGATT





2320 2330 2340 2350 2360 2370 2380 2390 2400 2410 2420 2430 2440 2450 2460 2470 2480 2490 2500 2510 2520 25

a a c  
a a c  
g g c  
c c c  
g g c  
a g c  
c c g  
c c g  
a a t c  
g g g c  
g g g c  
g g g c  
c c c  
c c g  
g g c  
t t c  
g c c t t  
g g c  
g g c  
g g c  
a a c  
a g c  
a g c  
a g c  
c g c  
c g c  
g g c  
g g c  
g g c  
a a c  
a a c  
a a c  
c c g

TTTTGGGTGGCTGGAAGTTCAAATTAAGTTTTTTTCTTCTGTTTTCTGACAAGAAATGCGCCAAAGAGTTTTCGCCGTTATTTCTATCGAGTGGTCTTTTTGCTTTAGTCTTCTCTGGGCTAGCGATCACTGCAAATTAGGCTTTACTGGTACGAGTTAACTTTTTTCTTTTTTTGTCATCCTTTCTTTGGG













**Figure S7: Distribution of Tajima's D values in the upstream and downstream regions.** Red points represent the region implicated in binding to the histone deacetylase RpdL3.

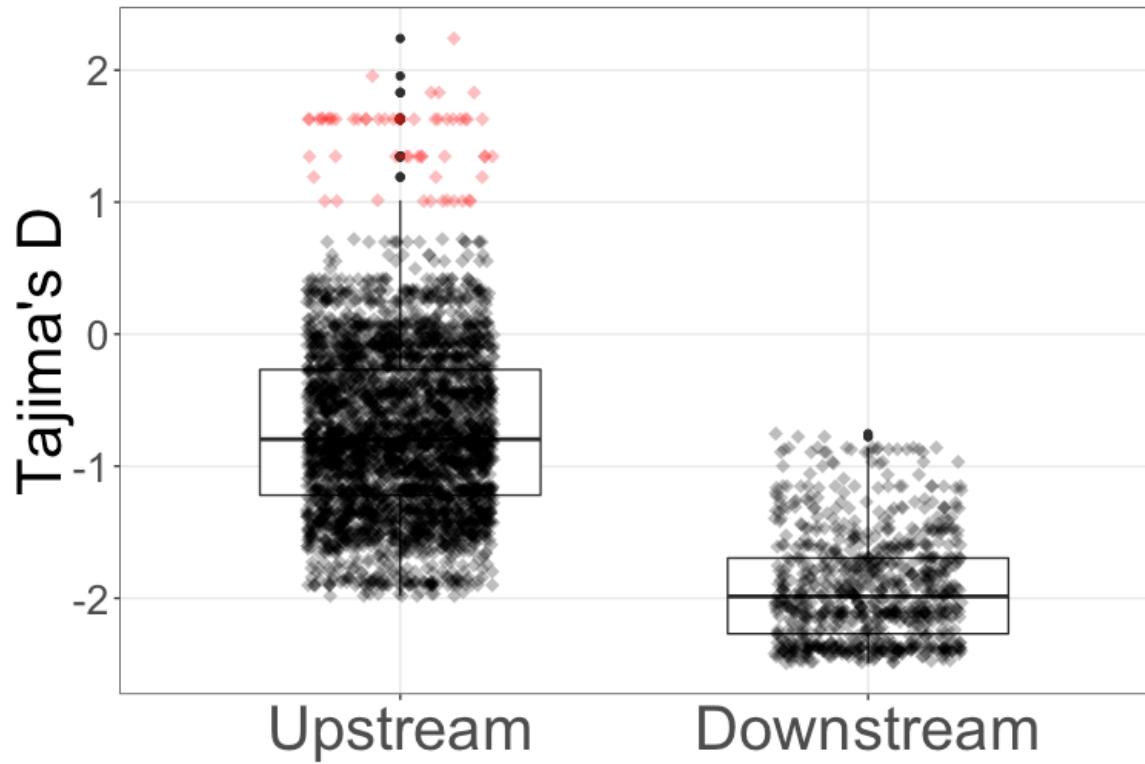

**Figure S8: Distribution of social scores among the regulatory clades.**  
See the phylogenetic tree (Figure 2a) for allele identities and clades.

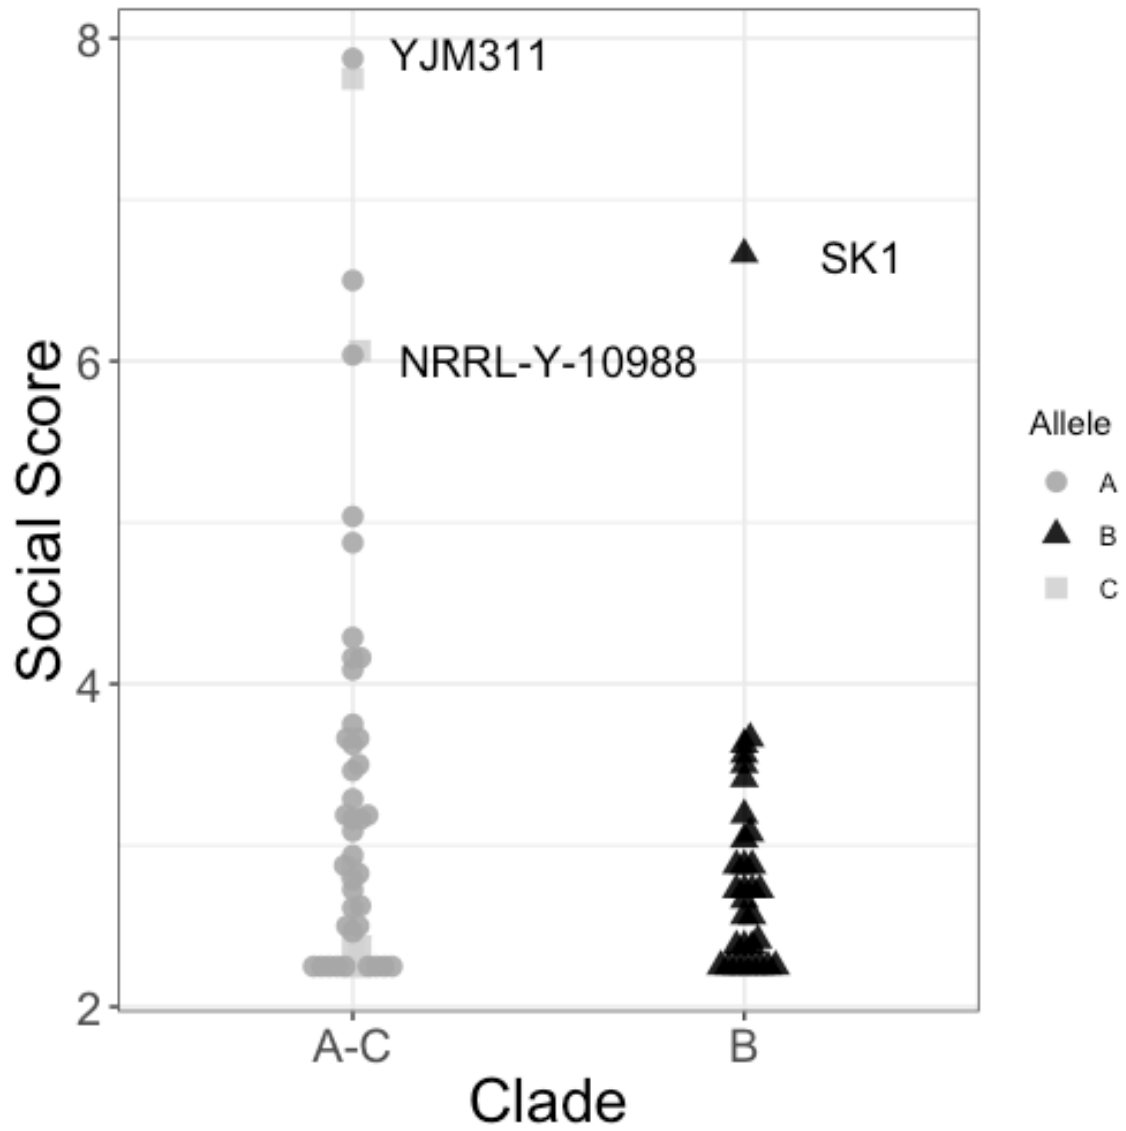



## Pure Backgrounds

### NRRL Y-10988

*FLO11/FLO11*

*FLO11/Δflo11*

*Δflo11/Δflo11*

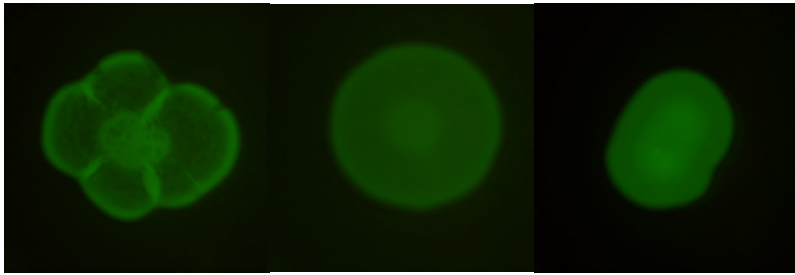

HMY401

HMY450

HMY458

### YPS681

*FLO11/FLO11*

*FLO11/Δflo11*

*Δflo11/Δflo11*

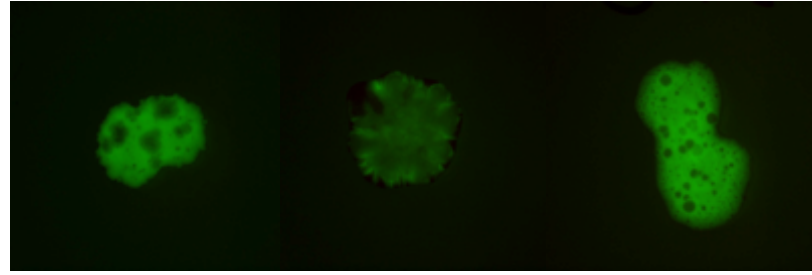

HMY390

HMY388

HMY391

### YJM311

*FLO11/FLO11*

*FLO11/Δflo11*

*Δflo11/Δflo11*

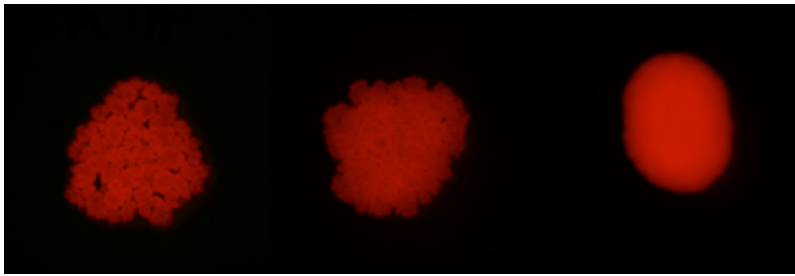

HMY411

HMY409

HMY412

### YPS681

*FLO11/FLO11*

*FLO11/Δflo11*

*Δflo11/Δflo11*

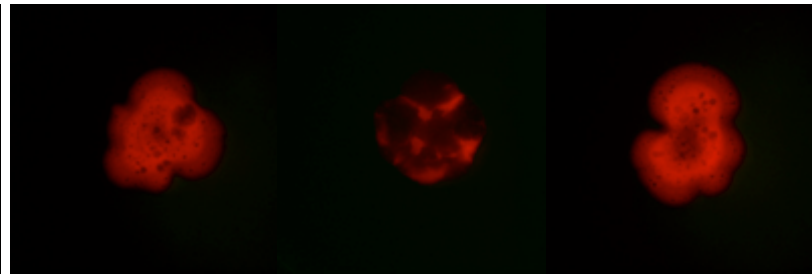

HMY414

HMY402

HMY403

## Hemizygous Hybrid Backgrounds: Same *FLO11* Allele

### YJM311 x YPS681

*Δflo11* + *Δflo11*

*FLO11*<sub>311</sub> + *FLO11*<sub>311</sub>  
1:1

*FLO11*<sub>681</sub> + *FLO11*<sub>681</sub>

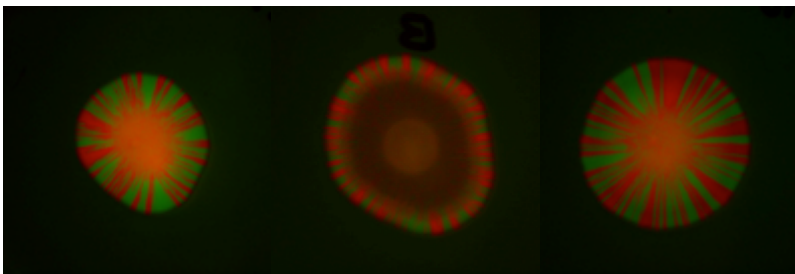

10:1

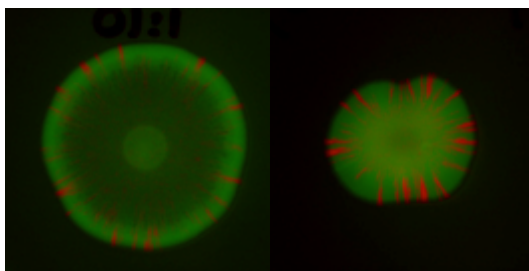

1:10

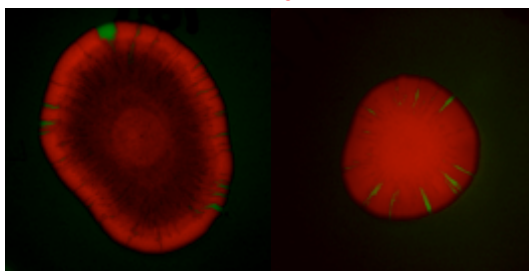

HMY433xHMY434

HMY439xHMY436

HMY432xHMY435

### NRRL Y-10988 x YPS681

*Δflo11* + *Δflo11*

*FLO11*<sub>10988</sub> + *FLO11*<sub>10988</sub>  
1:1

*FLO11*<sub>681</sub> + *FLO11*<sub>681</sub>

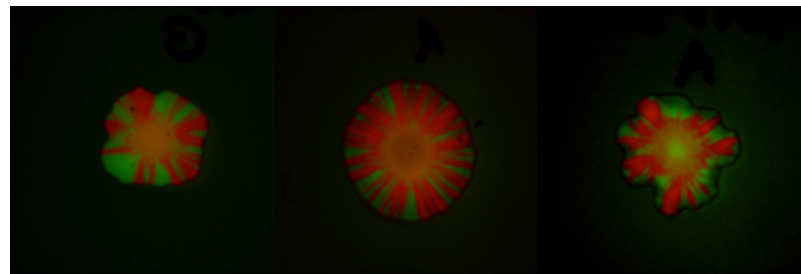

10:1

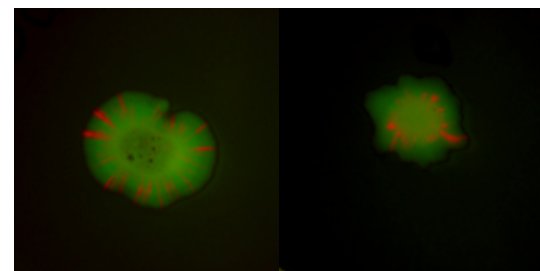

1:10

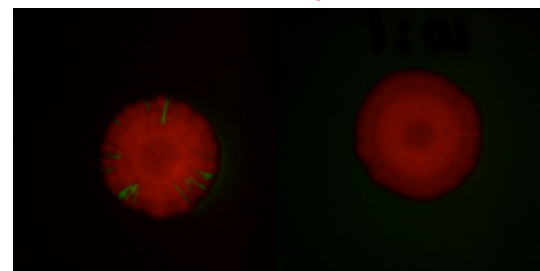

HMY465xHMY463

HMY446xHMY444

HMY467xHMY464

## NRRL Y-10988 x YJM311

$\Delta flo11 + \Delta flo11$

$FLO11_{311} + FLO11_{311}$

$FLO11_{10988} + FLO11_{10988}$

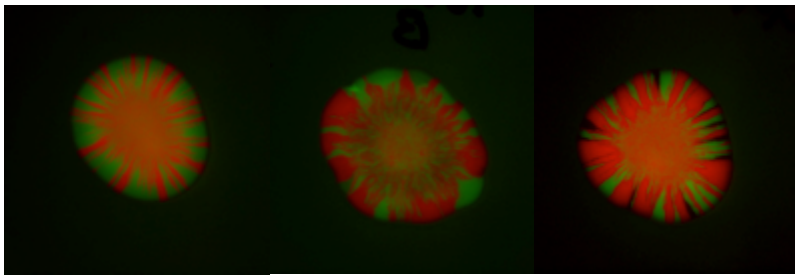

1:1

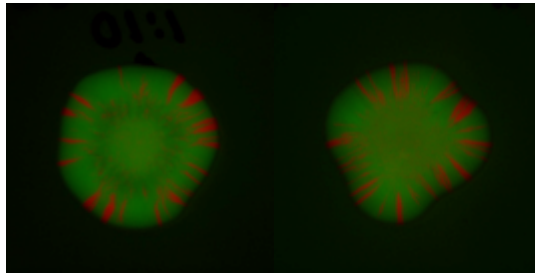

10:1

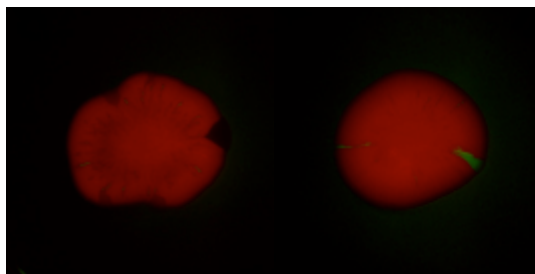

1:10

HMY466xHMY475

HMY462xHMY468

HMY442xHMY441

**Figure S9: Functional assay of natural *FLO11* alleles.** Ratios indicate the volume of each strain used to create a mixed inoculum. **(A)** Three genetic backgrounds with varying levels of social phenotypes. **(B)** Hybrids of the three strains, hemizygous for the *FLO11* locus. Different alleles generate different mat architectures. Mixed colonies of GFP and mCherry versions of the same strain demonstrate no fitness cost to the fluorescence; numerically disadvantaged strains remain rare in the final mat. **(C)** Mixed colonies of hybrids with different *FLO11* alleles. The *FLO11* allele from NRRL Y-10988 appears to dominate the edge of the biofilm in mixed communities with other alleles, even when it is numerically disadvantaged. In contrast, in mixed communities with YJM311 and YPS681 *FLO11* alleles, neither appears to have a fitness advantage.

## Hemizygous Hybrid Backgrounds: Different *FLO11* Alleles

### YJM311 x YPS681

$FLO11_{311} + FLO11_{681}$

$FLO11_{681} + FLO11_{311}$

### NRRL Y-10988 x YPS681

$FLO11_{10988} + FLO11_{681}$

$FLO11_{681} + FLO11_{10988}$

1:1

### NRRL Y-10988 x YJM311

$FLO11_{10988} + FLO11_{311}$

$FLO11_{311} + FLO11_{10988}$

10:1

1:10

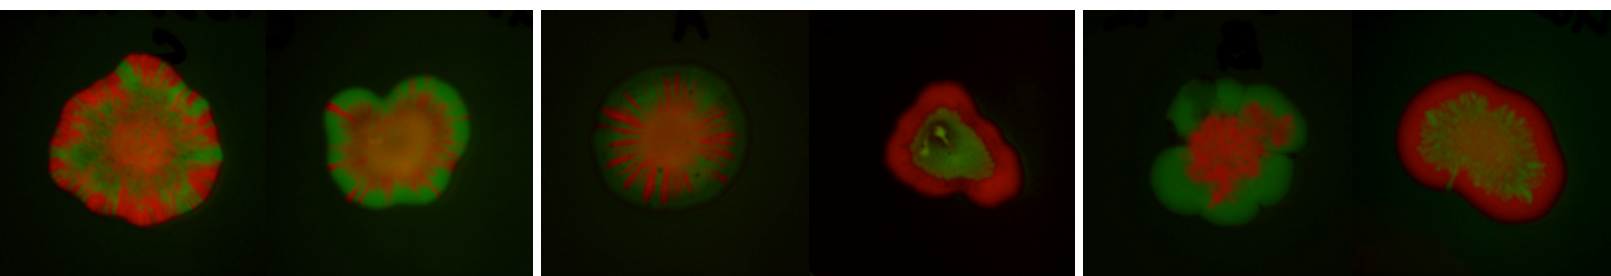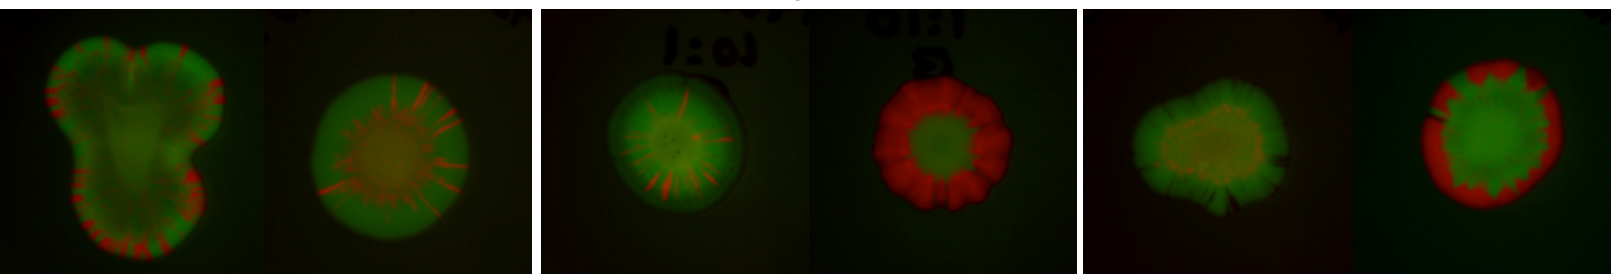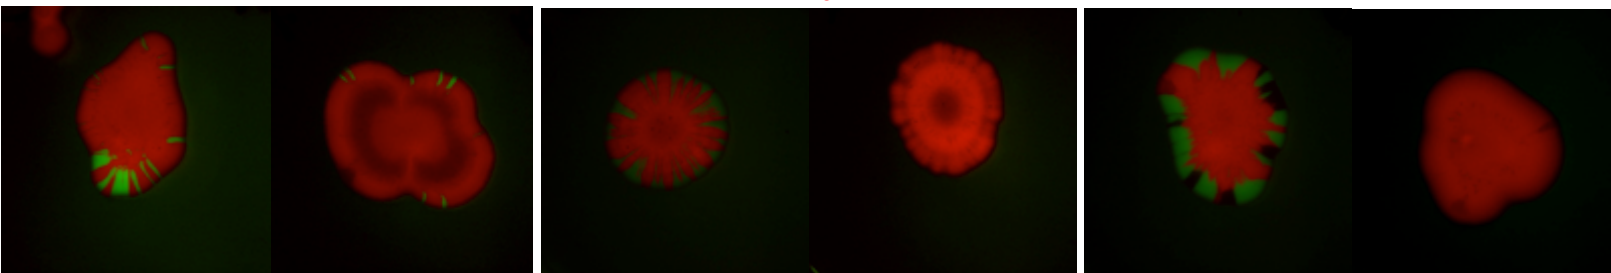

HMY439xHMY435

HMY432xHMY436

HMY446xHMY464

HMY467xHMY444

HMY442xHMY468

HMY462xHMY441

| Sample | HMV | Strain  | Parental isolate/<br>isogenic with | Isolate source or<br>other name | Geographic<br>origin | Origin              | Population | Upstream | Domain A | Domain C | Downstream | B Length | Reference |
|--------|-----|---------|------------------------------------|---------------------------------|----------------------|---------------------|------------|----------|----------|----------|------------|----------|-----------|
| 1      | 2   |         | YJM224                             |                                 | Unknown              | Distillery          |            | ✓        | ✓        | ✓        | ✓          | ✓        |           |
| 2      | 3   |         | YJM311                             | 91-212                          | CA, USA              | Clinical            | Mosaic     | ✓        | ✓        | ✓        | ✓          | ✓        |           |
| 4      | 25  | YJM244  | YJM210                             | CBS 1227                        | Romania              | Clinical            | Wine/Eur   | ✓        | ✓        | ✓        | ✓          | ✓        | 1         |
| 3      | 26  | YJM248  | YJM218                             | CBS 2910                        | Unknown              | Clinical<br>(feces) | Wine/Eur   | ✓        | ✓        | ✓        | ✓          | ✓        | 1         |
| 5      | 27  | YJM270  | YJM215                             | CBS 2807                        | Slovenia             | Wine                | Wine/Eur   | X        | X        | X        | X          | X        | 1         |
| 6      | 30  | YJM326  | YJM310                             | CBS 7838                        | CA, USA              | Clinical            | Mosaic     | ✓        | ✓        | ✓        | ✓          | X        | 1         |
| 7      | 31  | YJM428  | YJM308                             | CBS 7836                        | CA, USA              | Clinical            | Mosaic     | ✓        | ✓        | ✓        | ✓          | ✓        | 1         |
| 8      | 32  | YJM450  | YJM440                             | 92-123                          | CA, USA              | Clinical            | Mosaic     | ✓        | ✓        | ✓        | ✓          | ✓        | 1         |
| 9      | 33  | YJM451  | YJM436                             | B70302(b)                       | Unknown              | Clinical            | Mosaic     | ✓        | ✓        | ✓        | ✓          | ✓        | 1         |
| 10     | 35  | YJM456  | YJM454                             | 89-156                          | CA, USA              | Clinical            | Mosaic     | ✓        | ✓        | ✓        | ✓          | X        | 1         |
| 11     | 36  | YJM470  | YJM455                             | SUH                             | CA, USA              | Clinical            | Mosaic     | ✓        | ✓        | ✓        | ✓          | ✓        | 1         |
| 12     | 37  | YJM541  | YJM522                             | SUH                             | CA, USA              | Clinical            | Mosaic     | ✓        | ✓        | ✓        | ✓          | ✓        | 1         |
| 13     | 38  | YJM554  | YJM521                             | SUH                             | CA, USA              | Clinical            | Mosaic     | ✓        | ✓        | ✓        | ✓          | X        | 1         |
| 14     | 39  | YJM555  | YJM523                             | SUH                             | CA, USA              | Clinical            | Mosaic     | ✓        | ✓        | ✓        | ✓          | X        | 1         |
| 15     | 43  | YJM693  | YJM669                             | R91-48                          | TX, USA              | Clinical            | Mosaic     | ✓        | ✓        | ✓        | ✓          | ✓        | 1         |
| 16     | 45  | YJM969  | YJM967                             | 96-98                           | Italy                | Clinical            | Wine/Eur   | ✓        | ✓        | ✓        | ✓          | ✓        | 1         |
| 17     | 46  | YJM689  | YJM675                             | R93-1017                        | TX, USA              | Clinical            | Mosaic     | ✓        | ✓        | ✓        | ✓          | ✓        | 1         |
| 18     | 47  | YJM972  | YJM947                             | 96-100                          | Italy                | Clinical            | Wine/Eur   | ✓        | X        | X        | ✓          | X        | 1         |
| 19     | 57  | YJM1078 | YJM1075                            | NRRL YB-4348                    | Portugal             | Clinical            | Wine/Eur   | ✓        | ✓        | ✓        | ✓          | ✓        | 1         |
| 20     | 58  | YJM1083 | YJM1073                            | NRRL Y-10,988                   | NC, USA              | Clinical            | Mosaic     | ✓        | ✓        | ✓        | ✓          | ✓        | 1         |
| 21     | 59  | YJM1129 | YJM1123                            | NCMH 125                        | OH, USA              | Distillery          | Wine/Eur   | ✓        | ✓        | ✓        | ✓          | ✓        | 1         |
| 22     | 60  | YJM1133 | YJM1125                            | MMRL 125                        | NC, USA              | Clinical            | Mosaic     | ✓        | ✓        | ✓        | ✓          | ✓        | 1         |
| 23     | 62  | YJM1199 | YJM1115                            |                                 | MI, USA              | Clinical            | Mosaic     | ✓        | ✓        | ✓        | ✓          | X        | 1         |
| 24     | 64  | YJM1208 | YJM1119                            | 1882                            | MI, USA              | Clinical            | Mosaic     | ✓        | ✓        | ✓        | ✓          | ✓        | 1         |

|    |     |         |         |               |              |                      |                |   |   |   |   |   |   |     |
|----|-----|---------|---------|---------------|--------------|----------------------|----------------|---|---|---|---|---|---|-----|
| 25 | 67  | YJM1248 | YJM1219 | NRRL Y-1546   | West Africa  | Wine                 | West African   | ✓ | ✓ | ✓ | ✓ | ✓ | ✓ | 1   |
| 26 | 69  | YJM1252 | YJM1224 | NRRL Y-6679   | Spain        | Alpechin             | Wine/Eur       | ✓ | ✓ | ✓ | ✓ | ✓ | ✓ | 1   |
| 27 | 72  | YJM1290 |         | Sigma1278b    | Unknown      | Laboratory           | Mosaic         | ✓ | ✓ | ✓ | ✓ | X | ✓ | 1   |
| 28 | 75  | YJM1307 | YJM1071 | NRRL Y-961    | DC, USA      | Clinical             | Mosaic         | ✓ | ✓ | ✓ | ✓ | ✓ | ✓ | 1   |
| 29 | 76  | YJM1311 | YJM1101 | C. Kaufman    | MI, USA      | Clinical             | Mosaic         | ✓ | ✓ | ✓ | ✓ | ✓ | ✓ | 1   |
| 30 | 80  | YJM1338 | YJM1315 | NRRL Y-963    | MD, USA      | Sour fig             | Mosaic         | ✓ | ✓ | ✓ | ✓ | ✓ | ✓ | 1   |
| 31 | 82  | YJM1342 | YJM1324 | NRRL Y-12638  | South Africa | Soil                 | Mosaic         | ✓ | ✓ | ✓ | ✓ | ✓ | ✓ | 1   |
| 32 | 85  | YJM1381 | YJM1357 | NRRL YB-427   | Trinidad     | Rum fermentation     | Mosaic         | ✓ | ✓ | ✓ | ✓ | ✓ | ✓ | 1   |
| 33 | 88  | YJM1386 | YJM1365 | NRRL Y-11878  | Jamaica      | Sugar cane           | Mosaic         | ✓ | ✓ | X | ✓ | ✓ | ✓ | 1   |
| 34 | 91  | YJM1389 | YJM1368 | NRRL Y-17447  | Thailand     | Sewage               | Sake           | ✓ | ✓ | ✓ | ✓ | ✓ | ✓ | 1   |
| 35 | 92  | YJM1399 | YJM1393 | NRRL YB-908   | Unknown      | Wild cherry tree gum | Mosaic         | ✓ | ✓ | ✓ | ✓ | ✓ | ✓ | 1   |
| 36 | 93  | YJM1400 | YJM1394 | NRRL YB-4081  | Philippines  | Guava                | Mosaic         | ✓ | ✓ | ✓ | ✓ | ✓ | ✓ | 1   |
| 37 | 96  | YJM1415 | YJM1407 | NRRL Y-268    | France       | Wine                 | Wine/Eur       | ✓ | ✓ | ✓ | ✓ | ✓ | ✓ | 1   |
| 38 | 97  | YJM1417 | YJM1411 | NRRL YB-2541  | HI, USA      | ND                   | Wine/Eur       | ✓ | ✓ | ✓ | ✓ | ✓ | ✓ | 1   |
| 39 | 98  | YJM1418 | YJM1413 | NRRL YB-4506  | Japan        | Oak tree             | Mosaic         | ✓ | ✓ | ✓ | ✓ | ✓ | ✓ | 1   |
| 40 | 99  | YJM1419 | YJM1412 | NRRL YB-2625  | Unknown      | Bagasse              | Mosaic         | ✓ | ✓ | ✓ | ✓ | ✓ | ✓ | 1   |
| 41 | 100 | YJM1433 |         | Yllc17_E5     | France       | Wine                 | Wine/Eur       | ✓ | X | X | ✓ | X | ✓ | 1,2 |
| 42 | 103 | YJM1443 |         | UWOPS83-787.3 | Bahamas      | Fruit                | Mosaic         | ✓ | ✓ | ✓ | ✓ | ✓ | ✓ | 1,2 |
| 43 | 111 | YJM1479 | YJM1474 | NRRL Y-6297   | Phillipines  | Coconut tuba         | Mosaic         | ✓ | ✓ | ✓ | ✓ | ✓ | ✓ | 1   |
| 44 | 117 | YJM1615 | YJM312  | 91-213        | CA, USA      | Clinical             | Mosaic         | ✓ | ✓ | ✓ | ✓ | ✓ | ✓ | 1   |
| 45 | 121 | YJM1573 | YJM1566 | NRRL Y-12603  | India        | Fermented food       | Mosaic         | ✓ | ✓ | ✓ | ✓ | ✓ | ✓ | 1   |
| 46 | 122 | YJM1552 | S1      | S288c         | CA, USA      | Rotten fig           | Mosaic         | ✓ | ✓ | ✓ | ✓ | ✓ | ✓ | 1   |
| 47 | 124 | YJM1529 |         | M22           | Unknown      | Wine                 | Wine/Eur       | ✓ | ✓ | ✓ | ✓ | ✓ | ✓ | 1   |
| 48 | 158 |         |         | YPS128        | PA, USA      | Oak                  | North American | ✓ | ✓ | ✓ | ✓ | ✓ | ✓ | 3   |
| 50 | 160 |         |         | L-1528        | Chile        | Wine                 | Wine/Eur       | ✓ | ✓ | ✓ | ✓ | X | ✓ | 2   |
| 49 | 161 | YJM975  | YJM948  | 96-101        | Italy        | Clinical             | Wine/Eur       | ✓ | X | X | ✓ | ✓ | ✓ | 1   |
| 51 | 169 |         |         | SK1           | USA          | Soil, lab strain     | West African   | X | ✓ | ✓ | ✓ | ✓ | ✓ | 2   |
| 52 | 170 |         |         | K11           | Japan        | Sake strain          | Sake           | ✓ | ✓ | ✓ | ✓ | ✓ | ✓ | 2   |
| 53 | 171 |         |         | UWOPS05-217.3 | Malaysia     | Bertam Palm          | Malaysian      | ✓ | X | X | ✓ | ✓ | ✓ | 2   |
| 54 | 172 |         |         | NCYC361       | Ireland- S.  | Beer spoilage        | Mosaic         | ✓ | ✓ | ✓ | ✓ | ✓ | ✓ | 2   |



| <i>diastaticus</i> |     |         |        |                |                                |                        |                |   |   |   |   |   |     |
|--------------------|-----|---------|--------|----------------|--------------------------------|------------------------|----------------|---|---|---|---|---|-----|
| 55                 | 173 |         |        | DBVPG6765      | unknown- <i>S. bouldardi</i>   | Unknown                | Wine/Eur       | ✓ | X | X | ✓ | X | 2   |
| 56                 | 174 | YJM1549 |        | DBVPG6040      | Netherlands- <i>S. fructum</i> | Fermenting fruit juice | Mosaic         | ✓ | ✓ | ✓ | ✓ | ✓ | 1,2 |
| 57                 | 175 | YJM1463 |        | DBVPG1853      | Ethiopia                       | White tecc             | Wine/Eur       | ✓ | X | X | ✓ | ✓ | 1,2 |
| 58                 | 217 | YJM145  | YJM128 | CBS 7833       | MO, USA                        | Clinical               |                | ✓ | ✓ | ✓ | ✓ | X | 1   |
| 59                 | 261 | YJM978  | YJM954 | 96-109         | Italy                          | Clinical               | Wine/Eur       | ✓ | ✓ | ✓ | ✓ | ✓ | 1   |
| 60                 | 262 | YJM1434 |        | YPS606         | PA, USA                        | Oak                    | North American | ✓ | ✓ | ✓ | ✓ | ✓ | 3   |
| 61                 | 263 |         |        | L-1374         | Chile                          | Wine                   | Wine/Eur       | ✓ | X | X | ✓ | ✓ | 2   |
| 62                 | 264 | YJM1460 |        | Y12            | Africa                         | Palm Wine              | Sake           | ✓ | ✓ | ✓ | ✓ | ✓ | 1,2 |
| 63                 | 265 |         |        | YS2            | Australia                      | Baker strain           | Mosaic         | ✓ | ✓ | ✓ | ✓ | ✓ | 2   |
| 64                 | 266 | YJM1439 |        | NCYC110        | West Africa                    | Ginger beer            | West African   | ✓ | ✓ | ✓ | ✓ | X | 1,2 |
| 65                 | 267 |         |        | DBVPG1106      | Australia                      | Grape                  | Wine/Eur       | ✓ | ✓ | ✓ | ✓ | ✓ | 2   |
| 66                 | 268 |         |        | 378604X        | Newcastle, UK                  | Clinical               | Mosaic         | ✓ | ✓ | ✓ | ✓ | ✓ | 2   |
| 67                 | 270 |         |        | YPS681         | PA, USA                        | Oak                    | North American | ✓ | ✓ | ✓ | ✓ | ✓ | 4   |
| 68                 | 271 |         |        | YPS615         | PA, USA                        | Oak                    | North American | ✓ | ✓ | ✓ | ✓ | ✓ | 4   |
| 69                 | 272 |         |        | YPS617         | PA, USA                        | Oak                    | North American | ✓ | ✓ | ✓ | ✓ | ✓ | 4   |
| 70                 | 273 |         |        | YPS661         | PA, USA                        | Oak                    | North American | ✓ | ✓ | ✓ | ✓ | ✓ | 4   |
| 71                 | 274 |         |        | YPS670         | PA, USA                        | Oak                    | North American | ✓ | ✓ | ✓ | ✓ | ✓ | 4   |
| 72                 | 275 |         |        | YPS630         | PA, USA                        | Oak                    | North American | ✓ | ✓ | ✓ | ✓ | ✓ | 4   |
| 73                 | 276 |         |        | UWOPS3-461.4   | Malaysia                       | Bertam Palm, nectar    | Malaysian      | ✓ | ✓ | ✓ | X | ✓ | 2   |
| 74                 | 277 |         |        | Y55            | France                         | Wine, lab strain       |                | X | ✓ | ✓ | ✓ | ✓ | 2   |
| 75                 | 278 |         |        | YS4            | Netherlands                    | Baker strain           | Mosaic         | ✓ | ✓ | ✓ | ✓ | ✓ | 2   |
| 76                 | 279 |         |        | DBVPG1788      | Finland                        | Soil                   | Wine/Eur       | ✓ | ✓ | ✓ | ✓ | ✓ | 2   |
| 77                 | 280 |         |        | DBVPG6044      | West Africa                    | Bili wine              | West African   | ✓ | ✓ | ✓ | ✓ | ✓ | 2   |
| 78                 | 281 |         |        | Y9; NRRL-Y5997 | Japan                          | Ragi wine              | Sake           | ✓ | ✓ | ✓ | ✓ | X | 2   |

**Table S1.** List of the 78 strains, along with their parental isolate name, geographic and environmental origin, as well as population membership (according to ref 1.). The data obtained for each strain is indicated with a check. (1) Strobe, P.K., et al. (2015), *Genome Research*, 25(5):762-774. (2) Liti, G., et al. (2009), *Nature*, 458: 337-341. (3) Sniegowski, P.D., et al. (2002), *FEMS Yeast Research*, 1: 299-306. (4) Murphy, H.A. and C.W. Zeyl (2012), *Evolution*, 66(4): 1196-1209.

| Systematic Name | Standard Name | cont'd    | cont'd | cont'd    | cont'd |
|-----------------|---------------|-----------|--------|-----------|--------|
| YBR067C         | TIP1          | YIL011W   | TIR3   | YLR390W-A | CCW14  |
| YBR162C         | TOS1          | YJL158C   | CIS3   | YMR238W   | DFG5   |
| YDR055W         | PST1          | YJL159W   | HSP150 | YMR305C   | SCW10  |
| YDR077W         | SED1          | YJL171C   | TOH1   | YMR307W   | GAS1   |
| YDR261C         | EXG1          | YJR004C   | SAG1   | YNL190W   | n/a    |
| YDR349C         | YPS7          | YKL046C   | DCW1   | YNL300W   | TOS6   |
| YEL040W         | UTR2          | YKL096W   | CWP1   | YNL322C   | KRE1   |
| YER150W         | SPI1          | YKL096W-A | CWP2   | YNL327W   | EGT2   |
| YGL028C         | SCW11         | YLR040C   | AFB1   | YNR044W   | AGA1   |
| YGL228W         | SHE10         | YLR042C   | n/a    | YOL132W   | GAS4   |
| YGR279C         | SCW4          | YLR110C   | CCW12  | YOR009W   | TIR4   |
| YHL009C         | YAP3          | YLR194C   | NCW2   | YOR010C   | TIR2   |
| YHR126C         | ANS1          | YLR342W   | FKS1   | YOR214C   | SPR2   |
| YHR143W         | DSE2          | YLR343W   | GAS2   | YPR159W   | KRE6   |

**Table S2:** Genes recovered from literature search for GPI-anchored and cell wall associated proteins.

| Sample | HMY   | Strain                    | cont'd | cont'd | cont'd                    | cont'd | cont'd | cont'd                     |
|--------|-------|---------------------------|--------|--------|---------------------------|--------|--------|----------------------------|
| 3      | HMY26 | CBS2910 <sup>1</sup>      | 22     | HMY60  | MMRL 125 <sup>1</sup>     | 44     | HMY117 | 91-213 <sup>1</sup>        |
| 4      | HMY25 | CBS1227 <sup>1</sup>      | 23     | HMY62  | YJM1115 <sup>1</sup>      | 45     | HMY121 | NRRL Y-12603 <sup>1</sup>  |
| 5      | HMY27 | CBS2807 <sup>1</sup>      | 24     | HMY64  | YJM1119 <sup>1</sup>      | 46     | HMY122 | S288c <sup>2</sup>         |
| 6      | HMY30 | CBS7838 <sup>1</sup>      | 25     | HMY67  | NRRL Y-1546 <sup>1</sup>  | 48     | HMY158 | YPS128 <sup>2</sup>        |
| 7      | HMY31 | CBS7836 <sup>1</sup>      | 26     | HMY69  | NRRL Y-6679 <sup>1</sup>  | 49     | HMY161 | 96-101 <sup>1</sup>        |
| 8      | HMY32 | 92-123 <sup>1</sup>       | 28     | HMY75  | NRRL Y-961 <sup>1</sup>   | 51     | HMY169 | SK1 <sup>2</sup>           |
| 9      | HMY33 | YJM436 <sup>1</sup>       | 29     | HMY76  | YJM1101 <sup>1</sup>      | 55     | HMY173 | DBVPG6765 <sup>2</sup>     |
| 10     | HMY35 | 89-156 <sup>1</sup>       | 30     | HMY80  | NRRL Y-963 <sup>1</sup>   | 56     | HMY174 | DBVPG6040 <sup>1</sup>     |
| 11     | HMY36 | YJM455 <sup>1</sup>       | 32     | HMY85  | NRRL YB-427 <sup>1</sup>  | 57     | HMY175 | DBVPG1853 <sup>1</sup>     |
| 12     | HMY37 | YJM522 <sup>1</sup>       | 34     | HMY91  | NRRL Y-17447 <sup>1</sup> | 57     | HMY175 | DBVPG1853                  |
| 13     | HMY38 | YJM521 <sup>1</sup>       | 35     | HMY92  | NRRL YB-908 <sup>1</sup>  | 59     | HMY261 | 96-109 <sup>1</sup>        |
| 14     | HMY39 | YJM523 <sup>1</sup>       | 36     | HMY93  | NRRL YB-4081 <sup>1</sup> | 60     | HMY262 | YPS606                     |
| 15     | HMY43 | R91-48 <sup>1</sup>       | 37     | HMY96  | NRRL Y-268 <sup>1</sup>   | 62     | HMY264 | Y12 <sup>1</sup>           |
| 16     | HMY45 | 96-98 <sup>1</sup>        | 38     | HMY97  | NRRL YB-2541 <sup>1</sup> | 62     | HMY264 | Y12 <sup>2</sup>           |
| 17     | HMY46 | R93-1017 <sup>1</sup>     | 39     | HMY98  | NRRL YB-4506 <sup>1</sup> | 64     | HMY266 | NCYC110 <sup>1</sup>       |
| 18     | HMY47 | 96-100 <sup>1</sup>       | 40     | HMY99  | NRRL YB-2625 <sup>1</sup> | 73     | HMY276 | UWOPS3-461.4 <sup>2</sup>  |
| 20     | HMY58 | NRRL Y-10988 <sup>1</sup> | 41     | HMY100 | YJM1433 <sup>1</sup>      | 77     | HMY280 | DBVPG6044 <sup>2</sup>     |
| 21     | HMY59 | NCMH 125 <sup>1</sup>     | 43     | HMY111 | NRRL Y-6297 <sup>1</sup>  | -      | HMY269 | UWOPS83-787.3 <sup>1</sup> |

**Table S3:** Strains with available genomes used for gene comparison to *FLO11*.

<sup>1</sup> Strope, P.K., et al. (2015), *Genome Research*, 25(5):762-774; <sup>2</sup> Yue, J.-X., et al. (2017), *Nature Genetics*, 49(6):913-924.

|                 | <b>HMY</b>            | <b>Genetic Background</b> | <b>PGK1-Fluorescence</b>            | <b>FLO11</b>                                    |
|-----------------|-----------------------|---------------------------|-------------------------------------|-------------------------------------------------|
| Pure Background | 390                   | YPS681                    | GFP-KanMX                           | <i>FLO11/FLO11</i>                              |
|                 | 388                   | YPS681                    | GFP-KanMX                           | <i>FLO11/Δflo11</i>                             |
|                 | 391                   | YPS681                    | GFP-KanMX                           | <i>Δflo11/Δflo11</i>                            |
|                 | 414                   | YPS681                    | mCherry-KanMX                       | <i>FLO11/FLO11</i>                              |
|                 | 402                   | YPS681                    | mCherry-KanMX                       | <i>FLO11/Δflo11</i>                             |
|                 | 403                   | YPS681                    | mCherry-KanMX                       | <i>Δflo11/Δflo11</i>                            |
|                 | 411                   | YJM311                    | mCherry-HphMX                       | <i>FLO11/FLO11</i>                              |
|                 | 409                   | YJM311                    | mCherry-HphMX                       | <i>FLO11/Δflo11</i>                             |
|                 | 412                   | YJM311                    | mCherry-HphMX                       | <i>Δflo11/Δflo11</i>                            |
|                 | 401                   | NRRL Y-10988              | GFP-KanMX                           | <i>FLO11/FLO11</i>                              |
|                 | 450                   | NRRL Y-10988              | GFP-KanMX                           | <i>FLO11/Δflo11</i>                             |
|                 | 458                   | NRRL Y-10988              | GFP-KanMX                           | <i>Δflo11/Δflo11</i>                            |
|                 | Hybrid Background     | 435                       | YPS681 x YJM311                     | mCherry-HphMX                                   |
| 436             |                       | YPS681 x YJM311           | mCherry-HphMX                       | <i>FLO11<sub>311</sub>/Δflo11</i>               |
| 434             |                       | YPS681 x YJM311           | mCherry-HphMX                       | <i>Δflo11/Δflo11</i>                            |
| 432             |                       | YPS681 x YJM311           | GFP-KanMX                           | <i>FLO11<sub>681</sub>/Δflo11</i>               |
| 439             |                       | YPS681 x YJM311           | GFP-KanMX                           | <i>FLO11<sub>311</sub>/Δflo11</i>               |
| 433             |                       | YPS681 x YJM311           | GFP-KanMX                           | <i>Δflo11/Δflo11</i>                            |
| 464             |                       | YPS681 x NRRL Y-10988     | mCherry-KanMX                       | <i>FLO11<sub>681</sub>/Δflo11</i>               |
| 444             |                       | YPS681 x NRRL Y-10988     | mCherry-KanMX                       | <i>FLO11<sub>10988</sub>/Δflo11</i>             |
| 463             |                       | YPS681 x NRRL Y-10988     | mCherry-KanMX                       | <i>Δflo11/Δflo11</i>                            |
| 467             |                       | YPS681 x NRRL Y-10988     | GFP-KanMX                           | <i>FLO11<sub>681</sub>/Δflo11</i>               |
| 446             |                       | YPS681 x NRRL Y-10988     | GFP-KanMX                           | <i>FLO11<sub>10988</sub>/Δflo11</i>             |
| 465             |                       | YPS681 x NRRL Y-10988     | GFP-KanMX                           | <i>Δflo11/Δflo11</i>                            |
| 468             |                       | YJM311 x NRRL Y-10988     | mCherry-HphMX                       | <i>FLO11<sub>311</sub>/Δflo11</i>               |
| 441             |                       | YJM311 x NRRL Y-10988     | mCherry-HphMX                       | <i>FLO11<sub>10988</sub>/Δflo11</i>             |
| 475             |                       | YJM311 x NRRL Y-10988     | mCherry-HphMX                       | <i>Δflo11/Δflo11</i>                            |
| 462             |                       | YJM311 x NRRL Y-10988     | GFP-KanMX                           | <i>FLO11<sub>311</sub>/Δflo11</i>               |
| 442             | YJM311 x NRRL Y-10988 | GFP-KanMX                 | <i>FLO11<sub>10988</sub>/Δflo11</i> |                                                 |
| 466             | YJM311 x NRRL Y-10988 | GFP-KanMX                 | <i>Δflo11/Δflo11</i>                |                                                 |
|                 | <b>HMY</b>            | <b>Genetic Background</b> | <b>Fluorescence</b>                 | <b>FLO11</b>                                    |
|                 | 483                   | NRRL Y-10988              | <i>prFLO11-GFP</i>                  | <i>FLO11<sub>10988</sub>/ Δflo11::GFP-KanMX</i> |
|                 | 484                   | YJM311 x NRRL Y-10988     | <i>prFLO11<sub>311</sub>-GFP</i>    | <i>FLO11<sub>10988</sub>/ Δflo11::GFP-KanMX</i> |
|                 | 485                   | YJM311                    | <i>prFLO11-GFP</i>                  | <i>FLO11<sub>311</sub>/ Δflo11::GFP-KanMX</i>   |
|                 | 486                   | YJM311 x NRRL Y-10988     | <i>prFLO11<sub>10988</sub>-GFP</i>  | <i>FLO11<sub>311</sub>/ Δflo11::GFP-KanMX</i>   |

**Table S4:** Strains engineered for functional analysis of *FLO11*.

| Primer                                | Sequence                                                                                                                                 | Design/Purpose                                                                                                                                                                                              |
|---------------------------------------|------------------------------------------------------------------------------------------------------------------------------------------|-------------------------------------------------------------------------------------------------------------------------------------------------------------------------------------------------------------|
| FLO11A-for<br>FLO11A-rev              | TTGGTCAATCAGAACAGGCAAC<br>GAGACATCTTTAGAGTAACACAGATATTC                                                                                  | To amplify <i>FLO11</i> and its associated regulatory regions                                                                                                                                               |
| PGK1-YRC-for<br>PGK1-YRC-rev          | GGTAAGGAATTGCCAGGTGTTGCTTTCTTATCCGAAAAGA<br>AA GGTGACGGATCCCCGGG<br>GAAAAGAAAAAATTGATCTATCGATTTCAATTCAATTCAAT<br>ATCGATGAATTCGAGCTCG     | To generate a cassette to produce fluorescence. 40 bp upstream and downstream of the <i>PGK1</i> stop codon plus homology to the pFA6a plasmid (GFP-KanMX cassette) and pBS34 (mCherry-KanMX)               |
| FLO11-MX-for<br>FLO11-MX-rev          | GACCCCTTTTCGTACAGAAGCCTTGGTCAATCAGAACAGG<br>CAACG CGTACGCTGCAGGTC<br>ACAGT GGCTTCAAAG AACTGCTGATTGCTCAAGGC<br>AATCAGTCCG ATCGATGAATTCGAG | To generate a cassette to delete <i>FLO11</i> and replace with antibiotic resistance gene. 45 bp homology to upstream and downstream of <i>FLO11</i> plus homology to antibiotic MX cassettes.              |
| FLO11-end-Kan-for<br>FLO11-pr-GFP-rev | AACATCGTAATGAAGAAACGAACATGTTGGAATTGTATCA<br>ATCGATGAATTCGAGCTCG<br>TACTTTTGTAGGCCTCAAAAATCCATATACGCACACT ATG<br>AGTAAAGGAGAAGAAGACTTTT   | To generate a cassette to replace <i>FLO11</i> with GFP. Homology to promoter of <i>FLO11</i> , ATG, and the 2nd codon on in GFP; homology to downstream of <i>FLO11</i> and the end of the KanMX cassette. |
| FLO11-Repeat-for<br>FLO11-Repeat-rev  | GGTTTCGCTTGGACTGGTTGAACATGGAAC<br>GATTTCCAGGCTTCTATTGGAACATAGAT                                                                          | To amplify the B-domain for length analysis.                                                                                                                                                                |

**Table S5.** Primers used in this study



| Tree                  | Model  | Parameter estimates                                                                    | Log Likelihood | No. Param. | AIC     | Comparison | Chi-squared | P-value |
|-----------------------|--------|----------------------------------------------------------------------------------------|----------------|------------|---------|------------|-------------|---------|
| A-domain              | Model1 | $p_0=0.70, p_1=0.30, \omega_0=0.016, \kappa=2.23$                                      | -2059.398      | 103        | 4324.8  | 2 vs. 1    | 49.106      | <0.0001 |
|                       | Model2 | $p_0=0.70, p_1=0.21, p_2=0.09, \omega_0=0.045, \omega_1=1, \omega_2=5.24, \kappa=3.04$ | -2034.845      | 105        | 4279.7  |            |             |         |
|                       | Model7 | $p=0.008, q=0.016, \kappa=2.24$                                                        | -2059.504      | 104        | 4327.0  | 8 vs. 7    | 48.966      | <0.0001 |
|                       | Model8 | $p=0.06, q=0.18, p_0=0.91, p_1=0.09, \omega=5.25, \kappa=3.05$                         | -2035.021      | 106        | 4282.0  |            |             |         |
|                       | ModelC | $\omega=0.60, \pi=3.32, \kappa=2.79$                                                   | -2100.346      | 113        | 4426.7  | E vs. C    | 39.858      | <0.0001 |
|                       | ModelE | $\omega_1=0.43, \omega_2=4.51, \pi=3.09, \kappa_1=3.71, \kappa_2=1.30$                 | -2080.417      | 115        | 4390.8  |            |             |         |
| A-C Concatenate       | Model1 | $p_0=0.71, p_1=0.29, \omega_0=0, \kappa=3.82$                                          | -4485.937      | 111        | 9193.9  | 2 vs. 1    | 222.014     | <0.0001 |
|                       | Model2 | $p_0=0.69, p_1=0.27, p_2=0.04, \omega_0=0.02, \omega_1=1, \omega_2=15.98, \kappa=5.04$ | -4374.93       | 113        | 8975.9  |            |             |         |
|                       | Model7 | $p=0.005, q=0.012, \kappa=3.76$                                                        | -4484.238      | 112        | 9192.5  | 8 vs. 7    | 218.568     | <0.0001 |
|                       | Model8 | $p=0.005, q=0.01, p_0=0.96, p_1=0.04, \omega=16.25, \kappa=5.05$                       | -4374.954      | 114        | 8977.9  |            |             |         |
|                       | ModelC | $\omega=0.62, \pi=5.69, \kappa=3.83$                                                   | -4506.825      | 121        | 9255.7  | E vs. C    | 47.642      | <0.0001 |
|                       | ModelE | $\omega_1=0.50, \omega_2=4.60, \pi=5.24, \kappa_1=5.08, \kappa_2=1.30$                 | -4483.004      | 123        | 9212.0  |            |             |         |
| A-B-C Concatenate     | Model1 | $p_0=0.70, p_1=0.30, \omega_0=0.007, \kappa=2.69$                                      | -6626.686      | 111        | 13475.4 | 2 vs. 1    | 250.794     | <0.0001 |
|                       | Model2 | $p_0=0.67, p_1=0.31, p_2=0.02, \omega_0=0, \omega_1=1, \omega_2=15.63, \kappa=3.18$    | -6501.289      | 113        | 13228.6 |            |             |         |
|                       | Model7 | $p=0.01, q=0.02, \kappa=2.70$                                                          | -6626.727      | 112        | 13477.5 | 8 vs. 7    | 284.204     | <0.0001 |
|                       | Model8 | $p=0.007, q=0.01, p_0=0.97, p_1=0.03, \omega=13.7, \kappa=3.25$                        | -6484.625      | 114        | 13197.3 |            |             |         |
|                       | ModelC | $\omega=0.53, \pi=3.46, \kappa=2.63$                                                   | -6724.781      | 121        | 13691.6 | E vs. C    | 41.526      | <0.0001 |
|                       | ModelE | $\omega_1=0.46, \omega_2=5.32, \pi=3.22, \kappa_1=2.69, \kappa_2=1.45$                 | -6704.018      | 123        | 13654.0 |            |             |         |
| GPI-Anchored Proteins | Model1 | $p_0=0.83, p_1=0.17, \omega_0=0.003, \kappa=3.05$                                      | -7310.787      | 77         | 14775.6 | 2 vs. 1    | 888.794     | <0.0001 |
|                       | Model2 | $p_0=0.81, p_1=0.13, p_2=0.06, \omega_0=0.009, \omega_1=1, \omega_2=16.2, \kappa=4.28$ | -6866.390      | 79         | 13890.8 |            |             |         |
|                       | Model7 | $p=0.009, q=0.055, \kappa=3.03$                                                        | -7320.583      | 78         | 14797.2 | 8 vs. 7    | 906.836     | <0.0001 |
|                       | Model8 | $p=0.009, q=0.051, p_0=0.94, p_1=0.06, \omega=15.9, \kappa=4.27$                       | -6867.165      | 80         | 13894.3 |            |             |         |
|                       | ModelC | $\omega=0.72, \pi=6.16, \kappa=3.15$                                                   | -7527.352      | 87         | 15228.7 | E vs. C    | 103.500     | <0.0001 |
|                       | ModelE | $\omega_1=0.57, \omega_2=7.82, \pi=5.81, \kappa_1=4.02, \kappa_2=1.35$                 | -7475.602      | 89         | 15129.2 |            |             |         |

**Table S6:** Results of the evolutionary analysis conducted in PAML using three different phylogenetic trees with their associated alignment, as well as a "strain" tree with an alignment of the fullest data set (i.e., including the part of the B domain that could be resolved and aligned). Parameter estimates associated with each model are listed:  $\omega$ = dN/dS rate;  $\pi$ = synonymous transversion rate;  $\kappa$ = transition/transversion rate; parameters with subscripts refer to estimates for a given site class;  $p_i$ = proportion of codons in a given site class; p and q are parameters describing a  $\beta$  distribution. For each data set, the random sites models that allow for the possibility of positive selection (2 and 8) were significantly better fits than those that did not (1 and 7), as determined by a likelihood ratio test. Likewise, the fixed sites model that allowed the dN/dS value to differ between the site partitions (E) was a significantly better model of the data than the model that held dN/dS constant between the partitions (C).

### A-Domain Tree

|            |                                                              |
|------------|--------------------------------------------------------------|
| Model<br>2 | 54D, 57N, 94W, 177Q, 183Q, 190D                              |
| Model<br>8 | 17N, 54D, 57N, 94W, 113Y, 119-, 177Q, 179A, 180S, 183Q, 190D |

### Concatenated A- and C-Domains Tree

|            |                                                                                                              |
|------------|--------------------------------------------------------------------------------------------------------------|
| Model<br>2 | 17N, 54D, 57N, 94W, 113Y, 114-, 118-, 119-, 177Q, 179A, 180S, 183Q, 190D, 200N, 203H, 406V(1188)             |
| Model<br>8 | 17N, 54D, 57N, 94W, 113Y, 114-, 118-, 119-, 134Y, 177Q, 179A, 180S, 183Q, 190D, 203H, 375K(1157), 406V(1188) |

### Concatenated A-, minor B- and C- Domains Tree

|            |                                                                                                              |
|------------|--------------------------------------------------------------------------------------------------------------|
| Model<br>2 | 54D, 94W, 113Y, 114-, 116-, 119-, 177Q, 190D, 203H, [220S(855), 228V(863), 299P(934)] 522K(1157)             |
| Model<br>8 | 54D, 94W, 113Y, 114-, 116-, 118-, 119-, 177Q, 183Q, 190D, 203H, [220S(855), 228V(863), 299P(934)] 522K(1157) |

### Genes of GPI-Anchored and Cell Wall Proteins Tree

|            |                                                                                                                                                                                                                                                                                                                                  |
|------------|----------------------------------------------------------------------------------------------------------------------------------------------------------------------------------------------------------------------------------------------------------------------------------------------------------------------------------|
| Model<br>2 | 4P, 6L, 7L, 17N, 54D, 57N, 60Q, 85K, 91K, 94W, 106G, 113Y, 114-, 118-, 119-, 129-, 131E, 133T, 172Q, 173G, 176A, 177Q, 178Y, 179A, 182W, 189F, 195C, 202G, [219V(854), 227S(862), 290T(925), 298T(933), 327T(962), 334T(969), 335T(970), 338T(973), 343S(978),] 521G(1156), 550T(1185), 552A(1187), 675S(1310), 731V(1366)       |
| Model<br>8 | 4P, 6L, 7L, 17N, 54D, 57N, 60Q, 85K, 91K, 94W, 106G, 113Y, 114-, 118-, 119-, 129-, 131E, 133T, 172Q, 173G, 175A, 176A, 177Q, 178Y, 179A, 182W, 189F, 195C, 202G, [219V(854), 227S(862), 290T(925), 298T(933), 327T(962), 334T(969), 335T(970), 338T(973), 343S(978),] 521G(1156), 550T(1185), 552A(1187), 675S(1310), 731V(1366) |

**Table S7:** Under random sites models that allowed for positive selection (M2 and M8), individual codons were identified as being under significant positive selection. Red and blue codons are associated with the apical regions of the A-domain and grey codons fall within the part of the B-domain that was included in the analysis (see Figure S4). Numbers refer to the amino acid within the concatenated A and C-domain alignment and numbers in parentheses refer to the amino acid within the reference strain, S288c, *FLO11* sequence (P>0.95).

| Tree                       | Model  | Parameter estimates                                                                      | Log Likelihood | No. Param. | AIC | Comparison | Chi-squared | P-value |
|----------------------------|--------|------------------------------------------------------------------------------------------|----------------|------------|-----|------------|-------------|---------|
| A-C strains with insert    | Model1 | $p_0=0.58, p_1=0.42, \omega_0=0.00, \kappa=1.83$                                         | -2741.054      | 43         |     | 2 vs. 1    | 105.82      | <0.0001 |
|                            | Model2 | $p_0=0.96, p_1=0.0003, p_2=0.04, \omega_0=0.439, \omega_1=1, \omega_2=63.9, \kappa=2.97$ | -2688.146      | 45         |     |            |             |         |
|                            | Model7 | $p=2.28, q=0.005, \kappa=1.93$                                                           | -2747.600      | 44         |     | 8 vs. 7    | 118.91      | <0.0001 |
|                            | Model8 | $p=65.4, q=83.7, p_0=0.96, p_1=0.04, \omega=63.9, \kappa=2.97$                           | -2688.146      | 46         |     |            |             |         |
|                            | ModelC | $\omega=11.90, \pi=2.14, \kappa=2.14$                                                    | -2691.529      | 53         |     | E vs. C    | 11.52       | 0.00069 |
|                            | ModelE | $\omega_1=1.30, \omega_2=999, \pi=11.59, \kappa_1=3.16, \kappa_2=1.42$                   | -2685.768      | 55         |     |            |             |         |
| A-C strains without insert | Model1 | $p_0=0.72, p_1=0.28, \omega_0=0, \kappa=4.61$                                            | -3774.625      | 76         |     | 2 vs. 1    | 91.292      | <0.0001 |
|                            | Model2 | $p_0=0.75, p_1=0.23, p_2=0.02, \omega_0=0.058, \omega_1=1, \omega_2=17.29, \kappa=5.46$  | -3728.979      | 78         |     |            |             |         |
|                            | Model7 | $p=0.005, q=0.012, \kappa=4.63$                                                          | -3774.725      | 77         |     | 8 vs. 7    | 92.664      | <0.0001 |
|                            | Model8 | $p=0.006, q=0.01, p_0=0.99, p_1=0.01, \omega=36.66, \kappa=5.52$                         | -3728.393      | 79         |     |            |             |         |
|                            | ModelC | $\omega=0.42, \pi=3.95, \kappa=4.61$                                                     | -3787.932      | 86         |     | E vs. C    | 23.772      | <0.0001 |
|                            | ModelE | $\omega_1=0.37, \omega_2=1.9, \pi=3.52, \kappa_1=5.62, \kappa_2=1.19$                    | -3776.046      | 88         |     |            |             |         |

**Table S8:** The sequence data that included the A- and C- domains concatenated was used to investigate whether separating the strains into groups with and without the insert (in the first interacting region of the protein) would affect the results. Models and parameters are as in Table S2. For both data sets, the random sites models that allow for the possibility of positive selection (2 and 8) were significantly better fits than those that did not (1 and 7), as determined by a likelihood ratio test. Likewise, the fixed sites model that allowed the dN/dS value to differ between the site partitions (E) was a significantly better model of the data than the model that held dN/dS constant between the partitions (C).

**Concatenated A- and C- Domains: Strains with Insert**

|         |                                                                                            |
|---------|--------------------------------------------------------------------------------------------|
| Model 2 | 4P, 17Y, 94S, 114D, 116N, 118D, 119W, 130D, 134Y, 177E, 178Y, 179A, 190Y, 196D, 200N, 203Y |
| Model 8 | 4P, 17Y, 94S, 114D, 116N, 118D, 119W, 130D, 134Y, 177E, 178Y, 179A, 190D, 196D, 200N, 203Y |

**Concatenated A- and C- Domains: Strains without Insert**

|         |                                                                                                                    |
|---------|--------------------------------------------------------------------------------------------------------------------|
| Model 2 | 54D, 57N, 113Y, 164S(180)*, 167Q(183), 359K(375,1010), 390V(406,1188), 569F(585,1204)*                             |
| Model 8 | 54D, 57N, 113Y, 161Q (177)*, 164S(180), 167Q(183), 359K(375,1010), 390V(406,1188), 513V(529,1164)*, 569F(585,1204) |

**Table S9:** Under random sites models that allowed for positive selection (M2 and M8), individual codons were identified as being under significant positive selection. Red and blue codons are associated with the apical regions of the A-domain (see Figure S4). Numbers refer to the amino acid within the concatenated A and C-domain alignment and numbers in parentheses refer to the amino acid when the insert is included in the sequence followed by the location in the reference sequence of S288C ( $P > 0.95$ ). \*  $P > 0.92$



|                    | Break Points | AICc     | $\Delta$ AICc | Segment                  | p-value |
|--------------------|--------------|----------|---------------|--------------------------|---------|
| A Domain           | 0            | 4025.05  |               | 1-648                    |         |
|                    | 1            | 3935.37  | 89.68         | 1-399, 400-648           | 0.0002  |
| A-C Concatenated   | 0            | 8739.24  |               | 1-1755                   |         |
|                    | 1            | 8538.30  | 200.94        | 1-617, 618-1755          | 0.0004  |
|                    | 2            | 8471.75  | 66.55         | 1-440, 441-890, 891-1755 | 0.0004  |
| A-B-C Concatenated | 0            | 13263.88 |               | 1-2199                   |         |
|                    | 1            | 12728.38 | 535.50        | 1-698, 699-2199          | 0.0004  |
|                    | 2            | 12700.43 | 27.96         | 1-461, 462-727, 728-2199 | 0.0004  |

**Table S10:** Results from the GARD analysis for each data set. In the concatenated data sets, the locations refer to the location of the input sequence and not the reference genome sequence (i.e., the majority of the B-domain is missing). The A-domain is the first 648 nucleotides; the interacting domains are 336-393 and 513-546.

| Tree                   | Model  | Parameter estimates                                                                    | Log Likelihood | No. Param. | AIC     | Comparison | Chi-squared | P-value |
|------------------------|--------|----------------------------------------------------------------------------------------|----------------|------------|---------|------------|-------------|---------|
| Section 1:<br>1-462    | Model1 | $p_0=0.74, p_1=0.26, \omega_0=0.025, \kappa=2.71$                                      | -1364.213      | 100        | 2928.4  | 2 vs. 1    | 49.778      | <0.0001 |
|                        | Model2 | $p_0=0.74, p_1=0.19, p_2=0.07, \omega_0=0.055, \omega_1=1, \omega_2=9.63, \kappa=4.00$ | -1339.324      | 102        | 2882.6  |            |             |         |
|                        | Model7 | $p=0.008, q=0.016, \kappa=2.79$                                                        | -1364.425      | 101        | 2934.9  | 8 vs. 7    | 49.978      | <0.0001 |
|                        | Model8 | $p=0.089, q=0.276, p_0=0.93, p_1=0.07, \omega=9.54, \kappa=4.02$                       | -1339.436      | 103        | 2886.9  |            |             |         |
|                        | ModelC | $\omega=0.48, \pi=4.34, \kappa=3.10$                                                   | -1392.434      | 110        | 3004.9  | E vs. C    | 17.42       | <0.0001 |
|                        | ModelE | $\omega_1=0.379, \omega_2=3.53, \pi=4.28, \kappa_1=3.72, \kappa_2=1.92$                | -1383.724      | 112        | 2991.5  |            |             |         |
| Section 2:<br>463-730  | Model1 | $p_0=0.77, p_1=0.23, \omega_0=0.077, \kappa=1.49$                                      | -1617.268      | 97         | 3428.5  | 2 vs. 1    | 126.38      | <0.0001 |
|                        | Model2 | $p_0=0.63, p_1=0.30, p_2=0.07, \omega_0=0.059, \omega_1=1, \omega_2=8.55, \kappa=2.23$ | -1554.078      | 99         | 3306.2  |            |             |         |
|                        | Model7 | $p=0.146, q=0.35, \kappa=1.49$                                                         | -1618.957      | 98         | 3433.9  | 8 vs. 7    | 130.89      | <0.0001 |
|                        | Model8 | $p=0.157, q=0.316, p_0=0.93, p_1=0.07, \omega=8.06, \kappa=2.19$                       | 1553.513       | 100        | 3307.1  |            |             |         |
|                        | ModelC | $\omega=0.72, \pi=1.64, \kappa=2.09$                                                   | -1703.781      | 107        | 3621.6  | E vs. C    | 48.11       | <0.0001 |
|                        | ModelE | $\omega_1=0.49, \omega_2=21.59, \pi=1.49, \kappa_1=2.16, \kappa_2=1.48$                | -1679.725      | 109        | 3577.5  |            |             |         |
| Section 3:<br>731-2199 | Model1 | $p_0=0.66, p_1=0.34, \omega_0=0, \kappa=3.6$                                           | -3445.500      | 97         | 7085    | 2 vs. 1    | 68.266      | <0.0001 |
|                        | Model2 | $p_0=0.8, p_1=0.16, p_2=0.04, \omega_0=0.125, \omega_1=1, \omega_2=9.835, \kappa=3.99$ | -3411.367      | 99         | 7020.7  |            |             |         |
|                        | Model7 | $p=0.005, q=0.0096, \kappa=3.61$                                                       | -3446.033      | 98         | 7088.1  | 8 vs. 7    | 61.236      | <0.0001 |
|                        | Model8 | $p=0.331, q=0.923, p_0=0.96, p_1=0.04, \omega=9.588, \kappa=4.01$                      | -3415.415      | 100        | 7030.83 |            |             |         |

**Table S11:** The sequence data that included the A-, minor B-, and C- domains concatenated was divided into three recombination blocks by the program GARD (nucleotides 1-462, 463-730, 731-2199); this division separated the two cell-cell interacting regions of the protein. Each block was separately analyzed by the program PAML; models and parameters as in Table S2. For all individual recombination blocks, the random sites models that allow for the possibility of positive selection (2 and 8) were significantly better fits than those that did not (1 and 7), as determined by a likelihood ratio test. Likewise, the fixed sites model that allowed the dN/dS value to differ between the site partitions (E) was a significantly better model of the data than the model that held dN/dS constant between the partitions (C).

**Each Recombination Block Analyzed Separately**

|            |                                                                                                                                                                                    |
|------------|------------------------------------------------------------------------------------------------------------------------------------------------------------------------------------|
| Model<br>2 | 54D, 57N, 94W, 113Y*, 114-**, 116-*, 118-**, 119-**, 177Q, 180S, 183Q, 190D, [220S(855), 228V(863), 256S(891), 274Q(909), 295S(930), 299P(934)], 551N(1186)                        |
| Model<br>8 | 54D, 57N, 94W, 113Y**, 114-**, 116-**, 118-**, 119-, 177Q, 180S, 183Q, 190D, [220S(855), 228V(863), 256S(891), 257F(892), 274Q(909), 295S(930), 299P(934)], 551N(1186), 732F(1367) |

**Table S12:** Under random sites models that allowed for positive selection (M2 and M8), individual codons were identified as being under significant positive selection. Red and blue codons are associated with the apical regions of the A-domain and grey codons fall within the part of the B-domain that was included in the analysis (see Figure S4). Numbers refer to the amino acid within the concatenated A, B, and C-domain alignment and numbers in parentheses refer to the amino acid within the reference strain, S288c, *FLO11* sequence ( $P > 0.95$ ). \*\* $P > 0.9$ , \*  $P > 0.86$ ;

| Source                                                                                                          | Sum of Squares | F-ratio       | p-value |
|-----------------------------------------------------------------------------------------------------------------|----------------|---------------|---------|
| Allele                                                                                                          | 0.1819         | 26.47 (1,82)  | <0.0001 |
| Medium                                                                                                          | 3.2845         | 478.09 (1,82) | <0.0001 |
| Genetic Background                                                                                              | 1.5437         | 224.70 (1,82) | <0.0001 |
| Allele*Medium                                                                                                   | 0.0306         | 4.45 (1,82)   | 0.038   |
| Allele*Background                                                                                               | 0.0653         | 9.51(1,82)    | 0.0028  |
| Medium*Background                                                                                               | 1.1716         | 170.54 (1,82) | <0.0001 |
| Allele*Medium*Background                                                                                        | 0.0057         | 0.83 (1,82)   | 0.3657  |
| <b>Genetic Background Contrast: Hybrid <i>pFLO11</i><sub>10988</sub> vs. Hybrid <i>pFLO11</i><sub>311</sub></b> |                | 2.18 (1,82)   | 0.1439  |

**Table S13.** ANOVA results for *prFLO11-GFP* expression.
